**Post-stroke administration of the p75 neurotrophin receptor modulator, LM11A-31, attenuates chronic changes in brain metabolism, increases neurotransmitter levels, and improves recovery**

Thuy-Vi V. Nguyen, Rachael H. Crumpacker, Kylie E. Calderon, Frankie G. Garcia, Jacob C. Zbesko, Jennifer B. Frye, Selena Gonzalez, Danielle A. Bechtel, Tao Yang, Marco A. Tavera-Garcia, Helena W. Morrison, Rick G. Schnellmann, Frank M. Longo, and Kristian P. Doyle

**Affiliations:**

**TVN:** Departments of Immunobiology and Neurology, University of Arizona, Tucson, AZ, USA

**RHC:** Department of Immunobiology, University of Arizona, Tucson, AZ, USA

**KEC:** Department of Immunobiology, University of Arizona, Tucson, AZ, USA

**FGG:** Department of Immunobiology, University of Arizona, Tucson, AZ, USA

**JCZ:** Department of Immunobiology, University of Arizona, Tucson, AZ, USA

**JBF:** Department of Immunobiology, University of Arizona, Tucson, AZ, USA

**SG:** Department of Neurology, University of Arizona, Tucson, AZ, USA

**DAB:** Department of Immunobiology, University of Arizona, Tucson, AZ, USA

**TY:** Department of Neurology and Neurological Sciences, Stanford University, Stanford, CA, USA

**MATG:** Department of Immunobiology, University of Arizona, Tucson, AZ, USA

**HWM:** College of Nursing, University of Arizona, Tucson, AZ, USA

**RGS:** Department of Pharmacology and Toxicology, University of Arizona, Tucson, AZ, USA,  
Southern Arizona VA Health Care System, Tucson, AZ

**FML:** Department of Neurology and Neurological Sciences, Stanford University, Stanford, CA,  
USA

**KPD:** Departments of Immunobiology and Neurology, and the Arizona Center on Aging, University of Arizona, Tucson, AZ, USA

## **LM11A-31 preserves neuronal health and function after stroke**

*The Journal of Pharmacology and Experimental Therapeutics*

### **Corresponding authors:**

Kristian P. Doyle, Ph.D.

Departments of Immunobiology and Neurology and the Arizona Center on Aging

University of Arizona, Tucson

1656 E. Mabel Street

Medical Research Building, Room 214

Tucson, AZ 85719

Telephone: (1) 520-626-8144

Email address: [doylekr@email.arizona.edu](mailto:doylekr@email.arizona.edu)

Thuy-Vi V. Nguyen, Ph.D.

Departments of Immunobiology and Neurology

University of Arizona, Tucson

1656 E. Mabel Street

Medical Research Building, Room 215

Tucson, AZ 85719

Telephone: (1) 650-269-5475

Email address: [thuyvin@email.arizona.edu](mailto:thuyvin@email.arizona.edu)

**Number of text pages: 37**

**Number of tables: 3 (including 2 supplementary tables)**

**Number of figures: 10**

**Number of references: 53**

**Number of words:**

226 (Abstract)

753 (Introduction)

1169 (Discussion)

**List of nonstandard abbreviations:**

|                |                                                                    |
|----------------|--------------------------------------------------------------------|
| A $\beta$      | Amyloid beta                                                       |
| AD             | Alzheimer's Disease                                                |
| AKT            | Ak strain transforming (RAC alpha serine/threonine-protein kinase) |
| APP            | Amyloid precursor protein                                          |
| BDNF           | Brain derived neurotrophic factor                                  |
| Cdk5           | Cyclin dependent kinase 5                                          |
| ChAT           | Choline acetyl transferase                                         |
| DH Stroke      | Distal middle cerebral artery occlusion + hypoxia stroke           |
| dMCAO          | distal Middle cerebral artery occlusion                            |
| FO             | Familiar object                                                    |
| G-CSF          | Granulocyte-colony stimulating factor                              |
| GM-CSF         | Granulocyte macrophage-colony stimulating factor                   |
| GSH            | Reduced glutathione                                                |
| GSK3 $\beta$   | Glycogen synthase kinase 3 beta                                    |
| GSSG           | Oxidized glutathione                                               |
| IFN- $\gamma$  | Interferon gamma                                                   |
| IL             | Interleukin                                                        |
| IP-10          | Interferon induced protein-10                                      |
| IRAK           | Interleukin-1 receptor associated kinase                           |
| KC             | Keratinocytes derived chemokine                                    |
| MCP-1          | Monocyte chemoattractant protein-1                                 |
| MIP-1 $\alpha$ | Macrophage inflammatory protein-1 alpha                            |
| MIP-1 $\beta$  | Macrophage inflammatory protein-1 beta                             |
| MIP-2          | Macrophage inflammatory protein-2                                  |

|                    |                                                                      |
|--------------------|----------------------------------------------------------------------|
| NeuN               | Neuronal nuclei                                                      |
| NF $\kappa$ B      | Nuclear factor kappa-light-chain-enhancer of activated B cells       |
| NGF                | Nerve growth factor                                                  |
| NMDA               | N-methyl-D-aspartate                                                 |
| NO                 | Novel object                                                         |
| NOR                | Novel object recognition                                             |
| OF                 | Open field                                                           |
| PCA                | Principal component analysis                                         |
| P75 <sup>NTR</sup> | p75 neurotrophin receptor                                            |
| PI3K               | Phosphoinositide 3 kinase                                            |
| RANTES             | Regulated on activation normal T cell expressed and secreted         |
| RI                 | Recognition index                                                    |
| SAB                | Spontaneous alternation behavior                                     |
| TCA                | Tricarboxylic acid                                                   |
| TH                 | Tyrosine hydroxylase                                                 |
| Thy1               | Thymocyte differentiation antigen 1                                  |
| TNF- $\alpha$      | Tumor necrosis factor-alpha                                          |
| TPA                | Tissue plasminogen activator                                         |
| UPLC-MS/MS         | Ultrahigh performance liquid chromatography/tandem mass spectrometry |

**Recommended section assignment:**

Drug Discovery and Translational Medicine

## **ABSTRACT**

The aim of this study was to test whether post-stroke oral administration of a small molecule p75 neurotrophin receptor (p75<sup>NTR</sup>) modulator (LM11A-31) can augment neuronal survival and improve recovery in a mouse model of stroke. Mice were administered LM11A-31 for up to 12 weeks, beginning 1 week after stroke. Metabolomic analysis revealed that after 2 weeks of daily treatment, mice that received LM11A-31 were distinct from vehicle treated mice by principal component analysis, and had higher levels of glutamate, serotonin, acetylcholine, and dopamine in their ipsilateral hemisphere. LM11A-31 treatment also improved redox homeostasis by restoring reduced glutathione. It also offset a stroke induced reduction in glycolysis by increasing acetyl-CoA. There was no effect on cytokine levels in the infarct. At 13 weeks following stroke, adaptive immune cell infiltration in the infarct was unchanged in LM11A-31 treated mice, indicating that LM11A-31 does not alter the chronic inflammatory response to stroke at the site of the infarct. However, LM11A-31 treated mice had less brain atrophy, neurodegeneration, tau pathology, and microglial activation in other regions of the ipsilateral hemisphere. These findings correlated with improved recovery of motor function on a ladder test, improved sensorimotor and cognitive abilities on a nesting test, and less impulsivity in an open field test. These data support small molecule modulation of the p75 neurotrophin receptor for preserving neuronal health and function during stroke recovery.

## **SIGNIFICANCE STATEMENT**

The findings from this study introduce the p75 neurotrophin receptor as a novel small molecule target for promotion of stroke recovery. Given that LM11A-31 is in clinical trials as a potential therapy for Alzheimer's disease, it could be considered as a candidate for assessment in stroke or vascular dementia studies.

## INTRODUCTION

People over the age of 55 have a 1 in 6 lifetime risk of having a stroke (Seshadri et al., 2006) and there are more than 6.5 million survivors of stroke in the United States (US) (<http://www.strokecenter.org/patients/about-stroke/stroke-statistics/>; Donkor, 2018). The only FDA approved drug available for the treatment of stroke is tissue plasminogen activator (TPA), and it targets acute ischemic stroke. No pharmacologic therapies are available to enhance recovery in the days and weeks after stroke, prompting the need to identify compounds commonly applied to, or in the pipeline for, the treatment of neurological disorders, such as Alzheimer's disease (AD). One such example is LM11A-31, a small molecule ligand for the p75 neurotrophin receptor (p75<sup>NTR</sup>). LM11A-31 is currently under Phase IIa clinical evaluation for the treatment of mild to moderate AD (ClinicalTrials.gov Identifier: NCT03069014).

p75<sup>NTR</sup> is expressed in basal forebrain cholinergic, cortical, hippocampal, noradrenergic, and other central nervous system (CNS) neurons (Becker et al., 2018) that have critical roles in learning and memory, cognition, psychological wellbeing, and sensorimotor functions. It is a tumor necrosis factor (TNF) family member receptor that recognizes neurotrophins, including nerve growth factor, neurotrophin-3, neurotrophin-4/5, and brain derived neurotrophic factor (BDNF). Although once categorized as a death initiating receptor, it is now clear that it can also promote cell survival through phosphoinositide 3-kinase (PI3K)/protein kinase B (AKT) and interleukin-1 receptor-associated kinase (IRAK)/nuclear factor kappa B (NFκB) dependent signaling mechanisms (Longo and Massa, 2008). The balance of pro-survival versus pro-apoptotic signaling is determined by the availability of adaptor molecules, which is itself determined by cell type and contextual cues (Longo and Massa, 2008).



LM11A-31 specifically functions as a p75<sup>NTR</sup> ligand. This specificity is supported by multiple lines of evidence, including the rapid recruitment of the IRAK p75<sup>NTR</sup> intracellular adaptor following treatment *in vitro*, the ability of LM11A-31 to block a p75<sup>NTR</sup> antibody from binding to the receptor, and conversely the ability of p75<sup>NTR</sup> antibodies to block LM11A-31 activity. It is also supported by loss of ligand signaling and function in p75<sup>NTR</sup><sup>-/-</sup> neurons, nerve growth factor (NGF)-like promotion of p75<sup>NTR</sup> endocytosis, and no detectable effect of LM11A-31 on tropomyosin receptor A (TrkA) (Longo and Massa, 2008; Longo and Massa, 2013). At nanomolar concentrations *in vitro*, LM11A-31 prevents neuronal death, promotes neurotrophic signaling, and inhibits neurodegenerative signaling through the p75<sup>NTR</sup> (Massa et al., 2006; Yang et al., 2008). Therefore, LM11A-31 functions as a p75<sup>NTR</sup> receptor modulator rather than a simple agonist or antagonist, switching p75<sup>NTR</sup> from neurodegenerative to neurotrophic signaling in neurons expressing p75<sup>NTR</sup> (Xie et al., 2019).

Importantly, LM11A-31 has shown therapeutic effects in multiple animal models of neurological diseases, including post-traumatic brain injury (Shi et al., 2013), human immunodeficiency virus (HIV) related dementia (Meeker et al., 2016; Fogle et al., 2021; Xie et al., 2021), contusion spinal cord injury (Tep et al., 2013), Huntington's disease (Simmons et al., 2016; Simmons et al., 2021), and AD (Knowles et al., 2013; Nguyen et al., 2014; Simmons et al., 2014; Yang et al., 2020a). In AD, LM11A-31 has been shown to be efficacious in male and female mice, and in two different mouse models of AD (Simmons et al., 2014). It has also been shown to reverse neuronal degeneration in late-stage AD pathology in transgenic mice (Knowles et al., 2009; Knowles et al., 2013; Simmons et al., 2013; Nguyen et al., 2014; James et al., 2017). LM11A-31 is orally bioavailable and CNS penetrant, exerting maximal efficacy in the 25-50 mg/kg range (HCl salt form), which at 50 mg/kg corresponds to a human equivalent dose of 284 mg for a 70 kg adult, per body surface area mouse to human conversion (Massa et al., 2006; Yang et al., 2008).

LM11A-31 reaches and preferentially accumulates in the brain compared to blood (Knowles et al., 2013), which reduces the likelihood of systemic toxicity.

In light of the efficacy of LM11A-31 across a wide spectrum of neurological diseases, its attractive pharmacokinetic properties, and the fact that it is currently undergoing clinical testing for the treatment of AD, we sought to determine whether LM11A-31 could protect neurons from the chronic sequelae of stroke that cause neurodegeneration in the weeks after stroke. We discovered in a mouse model of experimental stroke, that daily oral administration of LM11A-31 can mitigate secondary neurodegeneration, increase neurotransmitter levels, and improve functional recovery. These findings correlated with changes in redox homeostasis and energy metabolism in the injured hemisphere, but no changes in inflammation within the infarct. Together, these data support the use of LM11A-31 for preserving neuronal health and function in patients recovering from stroke.

## **MATERIALS AND METHODS**

### **Mice**

17-18-month-old, male C57BL/6J (The Jackson Laboratory, Stock No: 000664) mice were used for all experiments with the exception of the validation of the nest construction test for which 8-month-old amyloid protein precursor (APP) mutant mice (hAPP-SL) were used. These transgenic mice over-expresses human A $\beta$ PP751 containing the London (V717I) and Swedish (K670M/N671L) mutations under the control of the Thy1 promoter and are maintained on a C57BL/6 background (Rockenstein et al., 2001; Nguyen et al., 2014). All mice were given *ad libitum* access to food and water and were maintained in a 12-hour light/dark cycle in a

temperature-controlled housing facility. All dosing, behavioral experiments, and biochemical analyses were performed with blinding to surgical condition and test compound. Immunostaining was performed with blinding to test compound. All procedures met National Institute of Health guidelines with the approval of the University of Arizona Institutional Animal Care and Use Committee.

### **Stroke and sham surgeries**

Distal Middle Cerebral Artery Occlusion (dMCAO) with hypoxia (DH stroke) was performed as previously published (Doyle et al., 2012). Briefly, following anesthesia by isoflurane inhalation, the temporalis muscle was exposed by incision. The right MCA was identified and exposed using a microdrill on the skull. The meninges were cut, and the MCA was cauterized. The incision was then closed using surgical glue. Directly after receiving the dMCAO, mice underwent hypoxia (9% oxygen and 91% nitrogen) for 45 minutes. Sham operated mice underwent the same surgical steps, except for cauterization of the dMCA. They were also given 9% oxygen and 91% nitrogen for 45 minutes immediately after surgery. Throughout the surgery and hypoxia, mouse core temperature was monitored and maintained at 37°C. The purpose of hypoxia in this model is to increase infarct size, as C57BL/6 mice that receive a dMCAO without hypoxia have significantly smaller infarcts (Doyle et al., 2012). This stroke model results in a consistent infarct volume of approximately 25% of the ipsilateral hemisphere located in the somatosensory cortex and the M1 region of the motor cortex. Long term survivability is >80% in aged mice (Doyle et al., 2012; Nguyen et al., 2018). Mice were euthanized at 3- and 13-weeks following surgery with isoflurane inhalation and exsanguination and were perfused intracardially with 0.9% saline.

### **LM11A-31**

LM11A-31 [2-amino-3-methyl-pentanoic acid (2-morpholin-4-yl-ethyl)-amide], an isoleucine derivative, was synthesized by Ricerca Biosciences at >97% purity, as assessed by liquid chromatography/mass spectroscopy. LM11A-31 (final dose: of 50 mg/kg, HCl salt form) was prepared in sterile water and administered by oral gavage. This dose is efficacious in both male and female mice in two models of AD and has high efficacy on mid- to late-stage AD progression (Knowles et al., 2013; Nguyen et al., 2014; Simmons et al., 2014). An equivalent volume (10  $\mu$ l per gram of body weight) of sterile water was administered by oral gavage to vehicle (veh) treated mice.

### **Global metabolic profiling**

At 3 weeks following surgery, infarcts from stroked mice, and the equivalent region of the cortex from sham operated mice, were resected and the remainder of the ipsilateral hemispheres were snap frozen and sent to Metabolon (Morrisville, NC) for processing and analysis (Ribbenstedt et al., 2018). At Metabolon, samples were prepared by first removing proteins and extracting small molecules and metabolites through a series of aqueous and organic extractions. The resulting extract was divided into four aliquots, each of which then underwent metabolic profiling. Two aliquots were profiled using reverse phase ultrahigh performance liquid chromatography/tandem mass spectrometry (UPLC-MS/MS) in acidic positive ion conditions, one aliquot in conditions optimized for more hydrophobic compounds and the other in conditions optimized for more hydrophilic compounds. Another aliquot was profiled using UPLC-MS/MS in basic negative ion conditions, and the fourth aliquot using hydrophilic interaction ultra-performance liquid chromatography (HILIC/ULPC-MS/MS). Data extraction, compound identification, metabolite quantification, and data normalization were performed using Metabolon's proprietary software. Quality control and curation procedures were used to remove artifacts, mis-assignments, and background noise (Choi et al., 2018).

## **Multiplex immunoassay**

At 3 weeks following surgery, infarcts from stroked mice and the equivalent region of the cortex from sham operated mice were dissected and sonicated in ice cold 0.1 M phosphate buffered saline containing 1% triton X-100 and 0.1% sodium deoxycholate, Protease Inhibitor Cocktail (1:100; Millipore Sigma), and Phosphatase Inhibitor Cocktail 2 (1:100; Millipore Sigma). Following centrifugation, the total protein concentration of each supernatant was measured using a Direct Detect Infrared Spectrometer (Millipore Sigma). Cytokines/chemokines were then quantified by multiplex immunoassay using a high sensitivity mouse multiplex magnetic bead kit (Millipore Sigma) and performed according to the manufacturer's recommendations (MILLIPLEX MAP Mouse Cytokine/Chemokine Magnetic Bead Panel-Immunology Multiplex Assay, MCYTOMAG-70K). Each lysate sample, standard, and quality control were measured in duplicate. Plates were read using a MAGPIX instrument (Luminex, Austin, TX), and results were analyzed using MILLIPLEX Analyst 5.1 software (Millipore Sigma). For those analytes that were below the lower limit of detection, the lower limit of detection values was used for data analysis. Concentrations of cytokines/chemokines were normalized to concentrations of total protein in the lysates.

## **Nissl staining and immunohistochemistry**

At 13 weeks following stroke, brains were post-fixed in 4% paraformaldehyde for 24 hours, followed by cryopreservation in 30% sucrose. Frozen coronal sections (40  $\mu$ m) were then taken through the entire brain using a freezing Microtome HM 450 sliding microtome (ThermoFisher Scientific, Waltham, MA). Brain sections were stored in cryoprotectant medium at 20°C until processing. For Nissl staining, sections were mounted, dehydrated and cleared in xylenes, rehydrated, immersed in 0.5% cresyl violet acetate (MilliporeSigma, Burlington, MA) solution for

1 minute, rinsed with distilled water, differentiated in 0.25% acetic alcohol, dehydrated through a graded ethanol series, cleared, and cover slipped with mounting media. For immunostaining, sections were immunostained according to standard protocols (Nguyen et al., 2014). The following antibodies were used: mouse anti-neuronal nuclei (NeuN; Millipore Sigma), goat anti-choline acetyl transferase (ChAT; Millipore Sigma), rabbit anti-tyrosine hydroxylase (TH; Millipore Sigma), mouse anti-AT8 [recognizes tau phosphorylated at serine 202 and threonine 205 (p-tau<sup>Ser202/Thr205</sup>; ThermoFisher Scientific)], rat anti-CD68 (Bio-Rad AbD Serotec, Hercules, CA), rat anti-mouse B220/CD45R biotinylated (BD Biosciences, San Jose, CA), and hamster anti-CD3e (BD Biosciences). Briefly, free floating sections were immunolabeled with antibodies (1:500 for NeuN, 1:600 for ChAT, 1:1000 for TH, 1:800 for AT8, 1:1000 for CD68, 1:500 for B220/CD45R, and 1:1000 for CD3e) in conjunction with Mouse on Mouse (M.O.M.) Detection kit (for AT8), ABC Vector Elite, and 3,3'-diaminobenzidine (Vector Laboratories, Burlingame, CA) for visualization. Images were captured with a Keyence (Elmwood Park, NJ) BZ-X700 digital microscope.

### **Quantitative analysis of brain atrophy**

To measure brain atrophy following stroke, 2× images of whole brain sections, 2 sections per mouse, at approximately bregma –1.70 to –1.94 based on the mouse brain atlas of Franklin and Paxinos 3<sup>rd</sup> edition (Franklin and Paxinos, 2008), were analyzed for anatomical abnormalities via Nissl staining. Images were captured using a Keyence BZ-X700 digital microscope. The area of the lateral ventricles and the thickness of the primary somatosensory cortex, from the corpus callosum through layers I-VI of the cortex, of each hemisphere were manually traced for each section. The area of the ventricles and the thickness of the cortex were computed using NIH Image J (Media Cybernetics, Rockville, MD) software.

## **Quantitative analysis of neuronal degeneration**

For measurement of NeuN immunoreactivity, NeuN immunolabeled neurons in the primary somatosensory area adjacent to the infarct in the cortex, and in the area of axonal degeneration in thalamic white matter regions were analyzed. Two 10× fields were taken throughout each ipsilateral and contralateral brain region per section (2-3 sections per mouse for a total of 4-6 fields) between bregma +1.18 and +0.74. The percent area occupied by NeuN+ staining in each brain region was computed. For measurement of cholinergic neurodegeneration, ChAT immunolabeled cholinergic somas and their neurites in the medial septum of the basal forebrain were analyzed. Three 10× fields were taken throughout the medial septum per section (1-2 sections per mouse for a total of 3-6 fields) between bregma +1.18 and +0.74. The percent area occupied by ChAT+ staining in the medial septum was computed. For measurement of tyrosine hydroxylase labelled fiber projections into the primary somatosensory cortex adjacent to the infarct, two 10× fields were taken throughout each ipsilateral and contralateral brain region per section (2-3 sections per mouse for a total of 4-6 fields) between bregma +1.18 and +0.74. The percent area occupied by TH+ staining in each of these brain regions was computed.

## **Quantitative analysis of tau immunoreactivity**

AT8/p-tau immunolabeled deposits were analyzed in the degenerating white matter tracts of the thalamus at approximately bregma -1.70. One 10× field (2-3 sections per mouse for a total of 2-3 fields) were taken from each hemisphere of the thalamus at the reticular thalamus nucleus to the ventral posteromedial thalamus nucleus. The percentage occupied by p-tau+ staining was computed.

### **Quantitation of CD68, B220/CCD45R, and CD3e immunoreactivity in the stroke infarct**

Immunoreactivity of CD68 labeled microglia/macrophages, B220 labeled B cells, and CD3e labeled T cells were measured in the infarct using NIH Image J (Media Cybernetics, Rockville, MD). Three to six sections were stitched from 3-4 10× fields to capture the entire infarct area between bregma -0.46 mm and -1.94mm per mouse.

### **Quantitation of CD68 and CD3e immunoreactivity in white matter tracts of the thalamus**

CD68+ microglia and macrophages and CD3e+ T cells were analyzed separately per mouse at approximately bregma -1.70 in the white matter tracts of the thalamus (area of axonal degeneration) following stroke surgery. Two non-overlapping, adjacent 10× fields (2-4 sections per mouse for a total of 4-8 fields) were taken for CD68+ quantification from each hemisphere of the thalamus at the reticular thalamus nucleus to the ventral posteromedial thalamus nucleus. One 10× field (2 sections per mouse for a total of 2 fields) was taken for CD3e+ quantification at the same brain region. The percentage occupied by CD68+ or CD3e+ immunostaining was computed.

### **Ladder rung test**

The ladder rung test was adapted from the ladder rung walking task (Rha et al., 2011; Doyle et al., 2012). The apparatus consisted of plexiglass rungs (10.16 cm length × 0.32 cm diameter) spaced at a constant distance of 0.64 cm apart, inserted between two plexiglass walls (0.64 cm width × 76.20 cm length × 15.24 cm height) and spaced 3.18 cm apart, providing a wide enough space for the animal to transverse the ladder. The apparatus was suspended 18 cm from the



tabletop surface using blocks. The test was performed in a darkened room with a desk lamp illuminating the start zone to incentivize the animals to move across the ladder, and a small box was placed at the end zone. The mice were kept in a plastic chamber (9 cm × 8 cm × 14 cm) that was level with the plexiglass rungs at the start zone. As a mouse moved across the ladder, its steps were recorded from below, using a camera that slides along the surface of the testing table. Prior to pre-surgery testing, training was necessary to ensure that the animals were able to spontaneously traverse the apparatus. Eight training trials were required for animals to make an acceptable maximum number of limb placement errors ( $\leq 10-12\%$ ). Each mouse was tested once on each test day. Video recordings of each mouse traversing the ladder were analyzed at 0.25-0.30x playback speed using standard film playback software (VLC media player for Mac OSX). A trained observer focused on the front limb on the side of the body contralateral to the stroke infarct (i.e., front left paw). Once the mouse placed all four limbs on the ladder, the observer began counting correct steps and missteps of the front left paw. If the paw was placed on a rung and was not removed until the following step, a correct step was recorded. If the paw was placed on a rung and then slipped off the rung, or if the paw missed the rung entirely, a misstep was recorded. The percent correct foot placement was calculated as  $100 \times (\text{number of correct steps} / (\text{number of correct steps} + \text{number of missteps}))$ .

### **Nest construction test**

Mice were transferred to individual testing cages with all environmental enrichment items (i.e., domes, tunnels) removed. One square (5 cm) piece of nestlet (Ancare, Bellmore, NY) made of pressed cotton batting, was placed in the same place of each test cage. Mice were provided with food and water. Testing was performed overnight, and images of nests built by the mice were captured the next morning. Nests were scored as follows on a scale of 1-5 based on how they

were constructed: (i) nestlet was largely untouched (>90% remaining intact; 1 point); (ii) nestlet was partially torn up (50-90% remaining intact; 2 points); (iii) nestlet was mostly shredded, but often there was no identifiable nest site (<50% of the nestlet remaining intact and <90% within a quarter of the cage floor area, i.e., the cotton was not gathered into a nest, but scattered about the cage; 3 points); (iv) an identifiable, but flat nest (>90% of the nestlet shredded and the material was gathered into a nest within a quarter of the cage floor area, but the nest was flat, with walls higher than the mouse's body height around <50% of its circumference; 4 points); and (v) a near perfect nest (>90% of the nestlet shredded and shaped into a crater, with walls higher than the mouse's body height around >50% of its circumference; 5 points). This nest construction scoring system is based on Deacon and colleagues' protocol (Deacon, 2006). A cohort of 8-month-old APP mutant (hAPP-SL) mice (Rockenstein et al., 2001; Nguyen et al., 2014) and their wt littermates were used to validate the nest construction test.

### **Y-maze spontaneous alternation behavior (SAB) test**

Mice were tested in a Y-shaped maze composed of beige acrylonitrile butadiene styrene (ABS) plastic and consisting of two symmetrical arms and one longer arm set at a 120° angle from each other (equal arms: 7.5 cm width × 37.0 cm length × 12.5 cm height; longer arm: 7.5 cm width × 42.0 cm length × 12.5 cm height). Mice were placed at the end of the longest arm of the maze, facing outward, and allowed to freely explore the three arms for 5 minutes. Over the course of multiple entries, mice normally exhibit a tendency to visit a new arm of the maze rather than visiting a recently visited arm. An entry was recorded when all four limbs of the mouse were within an arm of the maze. The number of arm entries and the number of triads were recorded by ANY-

maze behavioral video tracking software (Stoelting, Wood Dale, IL), and the percentage of SAB was calculated by the software.

### **Novel object recognition (NOR) test**

The NOR arena consisted of a white opaque box measuring 38.0 cm width × 48.0 cm length × 20.0 cm height made of ABS plastic. Mice were habituated to the NOR arena over the course of 2 days prior to testing day. During the first day of habituation, mice were placed with cage mates for 15 minutes in the NOR arena. The following day, each mouse was allowed to explore the arena alone for 15 minutes. On testing day, each mouse first underwent an “object familiarization phase,” during which they were placed in the arena along with two identical objects located at different corners of the arena 5 cm from the walls. The objects consisted of children’s building blocks of different shapes and colors. Mice were habituated to the NOR arena over the course of 2 days prior to testing day. During the first day of habituation, mice were placed with cage mates for 15 minutes in the NOR arena. The following day, each mouse was allowed to explore the arena alone for 15 minutes. On testing day, each mouse first underwent an “object familiarization phase,” during which they were Published studies confirmed no innate preference between objects. Mice were allowed to explore the arena and objects for 5 minutes. Object exploration was defined as contact with the object by the mouse’s nose within 2 cm of the object, which was recorded by ANY-maze behavioral video tracking software. 4 hours following the object familiarization phase, each mouse underwent an “object recognition testing phase,” during which they were placed back in the arena with one of the objects they previously explored during the familiarization phase [the familiar object (FO)], and a novel object (NO). The object role (novel versus familiar) and position (left versus right) were balanced within each experimental group. Different sets of objects were used for each timepoint to control for biases from previously

exposed objects. ANY-maze behavioral video tracking software was used to compute the time each mouse spent exploring each object. The recognition index (RI) was calculated as (NO Time)/(NO Time + FO Time) and expressed as a percentage by multiplying by 100.

### **Open field (OF) testing**

The OF test assesses exploratory habits in a relatively large novel environment. The OF apparatus consisted of a beige ABS plastic arena measuring 50 cm length × 50 cm width × 50 cm height. The arena was divided into 10 cm squares (grid). The center zone of the arena measured 30 cm length × 30 cm width. The periphery zone included all the squares along the edge of the arena and measured 8 cm width. The space between the center and periphery zones was considered the “dead” zone. Each mouse was placed into the arena and allowed to explore for 5 minutes. During these 5 minutes, ANY-maze software was used to track the center of the animal’s body within the arena. The software then computed the number of entries and exits into each zone for each mouse.

### **Statistics**

Data were presented as mean ± SEM. Analyses were evaluated using an ANOVA and for planned comparisons, a two-tailed t-test. However, for planned comparisons with explicit predictions as to direction of difference, an ANOVA, followed by a one-tailed t-test was used. Significance was set at  $p < 0.05$ . For all figures, \* $p$  is  $< 0.05$ , \*\* $p$  is  $< 0.01$ , \*\*\* $p$  is  $< 0.001$ , and \*\*\*\* $p$  is  $< 0.0001$ . The statistical summary of the metabolomics data is shown in **Table 1**. Metabolon’s proprietary Pathway Surveyor tool was used to identify key pathways significantly altered by stroke and LM11A-31 treatment.

## RESULTS

### Study design

The goal of this study was to evaluate the therapeutic effect of a p75<sup>NTR</sup> small molecule ligand on recovery from stroke. To achieve this goal, the study was divided into two testing phases. For Phase I, mice underwent stroke or sham surgery and were orally administered LM11A-31 for 7 days per week, one dose per day, for two weeks, beginning one week after surgery (n=5 for sham-veh, n=5 for stroke-veh, and n=6 for stroke-31 experimental groups). At 3 weeks following surgery, mice were euthanized, and their infarcts were processed for multiplex immunoassay. The remainder of their ipsilateral hemispheres was processed for metabolomics. The goal of Phase I was to evaluate how LM11A-31 alters brain biochemistry and post-stroke inflammation during treatment (Phase I Study design, **Figure 1**).

For Phase II, a separate cohort of mice underwent baseline ladder rung testing, and their scores were used to stratify mice into either LM11A-31 or vehicle treatment groups (n=10 for stroke-veh, and n=10 for stroke-31 experimental groups). Mice then underwent stroke surgery and were administered either LM11A-31 or vehicle 5 days per week, once dose per day, by oral gavage for 12 weeks, beginning one week after surgery. The ladder rung test was repeated at 2 days, 2 weeks, 6 weeks, and 10 weeks after stroke surgery. During the 11th week of treatment, mice were tested on a panel of behavioral tests, including a nest construction test, a Y-maze Spontaneous Alternation Behavior (SAB) test, a Novel Object Recognition (NOR) test, and an Open Field (OF) test. After 12 weeks of treatment (13 weeks post-stroke), mice were euthanized, and their brains were processed for histology and immunostaining. The goal of Phase II was to

evaluate treatment efficacy of LM11A-31 in the context of stroke recovery (Phase II Study design, **Figure 1**).

### **Phase I: Global metabolic profiling of LM11A-31 treated mice**

After two weeks of treatment (3 weeks post stroke or sham surgery), global metabolic profiling of the ipsilateral hemispheres from the mice treated with LM11A-31 and vehicle returned measurements for 645 compounds. Following log transformation and imputation of missing values with the minimum observed value for each compound, a three-way ANOVA was performed to identify the chemicals that were significantly different between experimental groups.

Among the mice that were treated with vehicle alone, 169 chemicals were present at different signal intensities in stroked mice compared to sham-operated mice. Among the mice that were treated with LM11A-31, 135 chemicals were present at different intensities in stroked compared to sham-operated mice. The least difference in metabolic profile, which equated to changes in 38 chemicals, was detected among mice that underwent sham surgery, between those treated with LM11A-31 and those treated with vehicle. However, the equivalent comparison among stroked mice showed 159 chemicals that were altered by treatment with LM11A-31. These data indicate that (i) there are substantial alterations in brain metabolism at 3 weeks following stroke; (ii) that treatment with LM11A-31 in sham operated mice does not substantially alter brain metabolism; and (iii) that 2 weeks of LM11A-31 versus vehicle administration substantially alters chronic changes in brain metabolism induced by stroke.

Principle component analysis (PCA) was used to visually assess the separation between the experimental groups (**Figure 2**). There was both a separation along Component 1 due to treatment (**Figure 2B & C**), and along Component 2 due to stroke (**Figure 2B & D**). This analysis

demonstrated that there was sub-clustering based on both compound treatment and disease state. A summary of the numbers of chemicals that achieved statistical significance ( $p \leq 0.05$ ), as well as whether they were increased or decreased is shown in **Table 1**, and a full list of the metabolic changes are provided in **Supplementary Tables 1 and 2**.

Next, we used a pathway surveyor tool to evaluate which key pathways are altered by stroke and by LM11A-31 treatment after stroke. This finding revealed that LM11A-31 can mitigate stroke induced decreases in the levels of multiple neurotransmitters, as well as stroke induced changes in redox homeostasis and glucose metabolism. With regard to neurotransmitter levels, we found that following stroke, mice had lower levels of glutamate, serotonin, and acetylcholine in the ipsilateral hemisphere compared to mice that underwent sham surgery (**Figure 3A-C**). Treatment with LM11A-31 after stroke significantly increased the levels of each of these neurotransmitters. Notably, levels of dopamine trended towards a significant reduction following stroke ( $p = 0.1038$ ) and were also significantly increased by LM11A-31 treatment (**Figure 3D**).

Regarding redox homeostasis, global metabolic profiling revealed that stroke compared to sham surgery resulted in a decrease in reduced glutathione (GSH) in the ipsilateral hemisphere. LM11A-31 restored GSH in stroked mice (**Figure 4A**). LM11A-31 also increased levels of oxidized glutathione (GSSG) (**Figure 4B**). These results indicate that LM11A-31 treatment increases the pool of GSH available to modulate chronic changes in redox homeostasis caused by stroke.

Regarding glucose homeostasis, although levels of glucose were undetected, levels of pyruvate were reduced in the ipsilateral hemisphere of the mice that underwent stroke compared to sham surgery. This finding indicates that there is a reduction in glycolysis in the ipsilateral hemisphere at 3 weeks after stroke. There was also a trend towards a reduction in acetyl-CoA, the oxidative decarboxylation product of pyruvate (**Figure 5A**). This finding is an indication that the reduction

in glycolysis reduces the amount of acetyl-CoA available for the tricarboxylic acid (TCA) cycle. Treatment with LM11A-31 after stroke increased levels of acetyl-CoA (**Figure 5B**).

Treatment with LM11A-31 after stroke also altered the glycogenesis/glycogenolysis pathway (**Figure 5C**). This finding is supported by increases in maltotetraose, maltotriose, and maltose in the ipsilateral hemispheres of the LM11A-31 treated mice compared to the vehicle treated mice after stroke (**Figure 5D**). Like glucose, glycogen was undetected and so it is unclear whether these differences in intermediates are the result of increased glycogenolysis or increased glycogenesis. However, combined with the elevated level of acetyl-CoA seen in LM11A-31-treated mice compared to vehicle-treated mice following stroke, these findings provide evidence that LM11A-31 treatment increases glycogenolysis, thereby increasing the amount of glucose available for acetyl-CoA generation.

Acetyl-CoA can also be generated by beta oxidation of long-chain fatty acids. To determine whether the increase in acetyl-CoA was the result of increased fatty acid oxidation we evaluated whether LM11A-31 treatment after stroke increased the levels of carnitine and acetyl-carnitine, key metabolites required for the generation of acetyl-CoA by beta oxidation. Although levels of carnitine and acetyl-carnitine were increased by stroke, they were not further increased by LM11A-31 treatment after stroke (**Supplementary Tables 1 and 2**). This result indicates that the increase in acetyl-CoA levels in response to LM11A-31 treatment after stroke is unlikely due to an increase in the beta oxidation of long-chain fatty acids.

### **Phase I: Evaluation of cytokine/chemokine levels in the infarct in LM11A-31 treated mice**

We have previously provided evidence that stroke infarcts are sites of chronic inflammation (Doyle et al., 2015; Nguyen et al., 2016; Zbesko et al., 2018). To determine whether LM11A-31 has an



effect on chronic inflammation in the infarct, we used a multiplex immunoassay to measure cytokines/chemokines within the infarcts of Phase I mice and tissue from the equivalent region of the cortex from sham operated mice. Analytes of interest included granulocyte colony-stimulating factor (G-CSF), granulocyte-macrophage colony-stimulating factor (GM-CSF), interferon- $\gamma$  (IFN- $\gamma$ ), interleukin (IL)-1 $\alpha$ , IL-1B, IL-2, IL-4, IL-5, IL-6, IL-7, IL-9, IL-10, IL-12(p40), IL-12(p70), IL-13, IL-15, IL-17, interferon-induced protein-10 (IP-10), keratinocytes-derived chemokine (KC), monocyte chemoattractant protein-1 (MCP-1), macrophage inflammatory protein-1 $\alpha$  (MIP-1 $\alpha$ ), macrophage inflammatory protein 1 $\beta$  (MIP-1 $\beta$ ), macrophage inflammatory protein-2 (MIP-2), regulated on activation normal T cell expressed and secreted (RANTES), and tumor necrosis factor- $\alpha$  (TNF- $\alpha$ ). Out of these 25 cytokines/chemokines, only IP-10, IL-6, RANTES, MIP-2 $\alpha$ , and MIP-1 $\beta$  were increased in the infarct site at 3 weeks after stroke when compared to tissue from the equivalent hemisphere of sham operated mice. LM11A-31 did not alter the levels of these cytokines/chemokines (**Figure 6**). These data indicate that two weeks of LM11A-31 treatment does not ameliorate inflammation within the infarct site at 3 weeks following stroke.

### **Phase II: Evaluation of LM11A-31 on peripheral immune cell infiltration in the infarct and area of axonal degeneration**

The goal of Phase II was to evaluate the efficacy of LM11A-31 at ameliorating chronic neuropathology and neurodegeneration when treatment is initiated one week after stroke and after 12 weeks of daily dosing. The impact of LM11A-31 on inflammation in the infarct was determined by immunostaining of CD68+ microglia/macrophages, B220+ B cells, and CD3e+ T cells at the site of the infarct. Percent area occupied by CD68+, B220+, and CD3e+ immunostaining revealed that LM11A-31 treatment after stroke did not alter macrophage, B lymphocyte or T lymphocyte cell infiltration into the infarct at 12 weeks (**Figure 7A-C**).

We previously reported that in the weeks after stroke, CD3e+ T cells are not only present in the infarct, but are also present in the thalamus, striatum, and internal capsule in the ipsilateral hemisphere (Doyle et al., 2015). These are locations of degenerating axons that project from the sensorimotor cortex, which is the cortical region infarcted in the DH stroke model. Treatment with LM11A-31 did not affect T cell infiltration into the thalamic white matter tracts of the area of axonal degeneration (**Figure 7D**).

### **Phase II: Evaluation of the impact of LM11A-31 on secondary neurodegeneration**

Stroke causes delayed ipsilateral cortical atrophy and tissue thinning in 3-5-month-old C57BL/6 mice at 8 weeks post-stroke (Nguyen et al., 2018). This atrophy is more pronounced and results in enlargement of the ipsilateral lateral ventricle in 18-month-old mice (Nguyen et al., 2018). Therefore, we next sought to determine whether brain atrophy caused by stroke can be prevented or reduced by treatment with LM11A-31. As shown in the representative images, stroked mice that were treated with LM11A-31 demonstrated a significant reduction in the degree of post-stroke ventricular enlargement compared to those treated with vehicle (**Figure 8A**). Additionally, vehicle-treated mice had significantly thinner ipsilateral primary somatosensory cortices than LM11A-31-treated mice following stroke (**Figure 8B**). These data demonstrate that LM11A-31 can ameliorate atrophy of the ipsilateral hemisphere following stroke.

Stroke induced cortical atrophy correlates with neurodegeneration, as demonstrated by a reduction of neuronal nuclei marker, NeuN, in the peri-infarct cortex of mice following stroke (Chung et al., 2018; Zbesko et al., 2018). As depicted in the representative images and quantification of stroked mice treated with LM11A-31 compared to vehicle, LM11A-31 treatment attenuated this reduction in NeuN+ immunoreactivity in the ipsilateral hemisphere (**Figure 8C**, *top*

*images*). Specifically, there was a reduction in NeuN+ expression in the ipsilateral compared to the contralateral hemisphere of the stroked mice (**Figure 8C, left graph**) and LM11A-31 administration resulted in a preservation of NeuN+ immunoreactivity (**Figure 8C, right graph**). These data demonstrate that LM11A-31 can decrease the loss of NeuN+ immunoreactivity that occurs in the ipsilateral hemisphere in aged mice following stroke.

Previously, we observed less ChAT+ staining in the medial septum of the basal forebrain of 18-month-old C57BL/6 mice at 8 weeks post-stroke (Nguyen et al., 2018). In the present study, there was a similar post-stroke loss in cholinergic neuron associated ChAT immunoreactivity in the medial septum. In mice treated with LM11A-31, there was a marked decrease in the loss of ChAT signal compared to mice administered vehicle (**Figure 8D**).

Though primarily expressed in basal forebrain cholinergic neurons and pyramidal cortical and hippocampal neurons (Mufson EJ et al. 1992 PNAS 89:569-573; Miller MW and et al. 2000 Brain Res 852:355-366; Dougherty KD et al. 1999 J Neurosci 19:10140-10152; Zagrebelsky M et al. 2005 J Neurosci 25:9989-9999), p75<sup>NTR</sup> is also present in neurons of the raphe nuclei, reticular formation, and locus coeruleus (noradrenergic neurons that contribute to the regulation of mood and behavioral states). TH+ neurites of noradrenergic neurons in the rostral portion of the locus coeruleus innervate hippocampal and cortical areas, and are markedly affected in, and correlate with, severity of cognitive decline (Grudzien et al., 2007) in AD and other neurodegenerative diseases, such as Down syndrome, Parkinson's disease, and Huntington's disease (Iversen et al., 1983; Mann, 1988; Zweig et al., 1992; Zarow et al., 2003). To determine whether stroke results in a loss of TH+ terminals innervating the peri-infarct cortical region, the density of TH+ labeled projections fibers in the ipsilateral and contralateral cortex was quantified. As shown in **Figure 8E (top images)**, TH+ projection fibers appeared diminished in density within the ipsilateral primary

somatosensory cortex, adjacent to the infarct, compared to the contralateral cortex in the stroked mice. There was a significant decrease in TH+ expression in the ipsilateral compared to the contralateral hemisphere of the stroked mice (**Figure 8E, left graph**) and LM11A-31 administration did not attenuate this reduction (**Figure 8E, right graph**). Together, these data provide evidence that LM11A-31 can reduce brain atrophy and preserve NeuN+ and ChAT+ immunoreactivity following stroke but is less effective at preventing the loss of TH+ projection fibers.

### **Phase II: Evaluation of the effect of LM11A-31 on microglial activation and tau hyperphosphorylation**

Ser202 and Thr205, the epitopes recognized by the antibody AT8 when they are phosphorylated, are among the tau residues that contribute to the pathological conformations of p-tau (Jeganathan et al., 2008). Previously, we reported that 18-month-old stroked mice develop tau pathology in areas of degenerating white matter tracts following stroke. Furthermore, it has been shown that excessive levels of p-tau are reduced in APP mutant (hAPP-SL) mice after LM11A-31 treatment (Nguyen et al., 2014). Consequently, we determined whether LM11A-31 reduces p-tau accumulation in degenerating white matter tracts following stroke. As seen in **Figure 9A (top images)**, quantitation revealed that (i) the ipsilateral hemisphere contained more p-tau deposits than the contralateral hemisphere in the stroked mice, and (ii) treatment with LM11A-31, and not vehicle, attenuated this p-tau burden within the ipsilateral hemisphere of the stroked mice (**Figure 9A, bottom graph**).

There is evidence for microglial activation in the proximity of tau deposits, and for the interplay of tau pathology and inflammatory cascades (Perea et al., 2020). Stroked mice exhibited numerous CD68 immunoreactive cells, which displayed an activated microglia morphology (large cell bodies

and bushy, thick processes) in the ipsilateral white matter tracks and a more typical resting morphology (small cell body with long branching processes) in the contralateral white matter tracks. In mice that underwent stroke, LM11A-31 administration decreased the burden of activated microglia (**Figure 9B** (top images)). Specifically, quantification of the area occupied by CD68 labeled microglia/macrophages revealed significantly more CD68+ staining in the white matter tracks of the ipsilateral compared to the contralateral hemisphere of the stroked mice (**Figure 9B**, *bottom left graph*). However, following stroke, LM11A-31 treated mice had less CD68+ staining than vehicle treated mice (**Figure 9B**, *bottom right graph*). These findings demonstrate that LM11A-31 reduces microglial activation in thalamic white matter tracts in aged mice after stroke.

## **Phase II: Evaluation of LM11A-31 on recovery following stroke**

Given the protective effects of LM11A-31 against brain atrophy, neurodegeneration, and loss of critical neurotransmitters, LM11A-31 was evaluated for its ability to improve recovery after stroke. Motor recovery was assessed by gait using the horizontal ladder rung test (Doyle et al., 2012). Previously, following DH stroke, C57BL/6 mice at 5 months of age displayed a motor impairment of the front limb contralateral to the stroke starting at day 1, which continues until 2 weeks post-surgery (Doyle et al., 2012).

As expected, 2 days following stroke, performance on the ladder rung test was impaired, which localized to the contralateral (left) front limb compared to naïve mice at baseline or pre-surgery (**Figure 10A**, *left images*: screenshots of video recordings to demonstrate a correct foot placement, and two different types of foot fault: an inability to grip the ladder rung with the front paw, and a foot slip). Scores from day 2 were used to stratify the mice into the LM11A-31 and

vehicle treatment groups (**Figure 10A**, *middle graphs*: stratification method). At 2 weeks, 6 weeks, and 10 weeks following stroke, LM11A-31 treated mice performed better than vehicle treated mice on the ladder rung test, as measured by percent correct foot placement (**Figure 10A**, *left graphs*).

Building nests is an innate and spontaneous mouse behavior and nest construction can be assessed and used as a test for psychiatric disturbances that suggest a lack of motivation, anxiety- and obsessive-compulsive behaviors, or pain (Jirkof, 2014). The nest construction test was validated using 8-month-old APP mutant (hAPP-SL) mice and their wt littermates, which are known to have a cognitive deficit (Faizi et al., 2012; Knowles et al., 2013; Nguyen et al., 2014) (**Figure 10B**, *left graph*). hAPP-SL mice scored lower than their wt littermates, validating that the test can record a deficit in normal behavioral function. Typically, mice will make nests achieving scores between 3.5 and 4.5, leaving 0.5 g of nestlets unshredded. Mice with hippocampal lesions achieve a median score of 2.0 (Deacon, 2006), which is in line with the score of our mice at 12 weeks following stroke (**Figure 10B**, *left image*). However, compared to treatment with vehicle alone, treatment with LM11A-31 improved the performance of mice on the nest construction test following stroke (**Figure 10B**, *right graph*).

The Y-maze was then used to test spontaneous alternation behavior (SAB). This test is based on the innate interest of rodents to explore a new environment. SAB has been shown to be impaired in AD, and Knowles and colleagues have demonstrated that LM11A-31 attenuates behavioral deficits on a Y-maze (Faizi et al., 2012; Knowles et al., 2013). A naïve or “normal” C57BL/6 mouse would typically score approximately 65-70% SAB (Faizi et al., 2012; Knowles et al., 2013). However, following stroke, we did not detect a difference in SAB between stroked mice given LM11A-31 and those given vehicle (**Figure 10C**).

Novel object recognition (NOR) is a form of explicit memory known to be impaired in AD. The NOR test was used to evaluate whether LM11A-31 affects AD-associated cognitive deficits in the stroke model. Following stroke there was no difference between stroked mice given LM11A-31 or vehicle; both experimental groups spent the same amount of time exploring a novel object relative to a familiar object (**Figure 10D**).

The open field (OF) test provides a measure of anxiety and impulsivity. In a similar test of the anxiety-impulsivity spectrum, the light-dark transition test, aged, stroked mice display more impulsive risk-taking behavior (Nguyen et al., 2018). Here, we found a difference between stroked mice treated with LM11A-31 and those administered vehicle. Compared to vehicle treated mice, LM11A-31 treated mice entered the open center zone significantly less than the open zone around the perimeter. The vehicle treated mice displayed less cautious behavior, entering the center zone with greater frequency (**Figure 10E**). This provides evidence that treatment with LM11A-31 mitigates impulsive behavior in stroked mice. Together these data demonstrate that LM11A-31 can promote motor recovery, restore overall well-being, and mitigate impulsive like behavior in aged mice following stroke.

## DISCUSSION

Due to the increasingly recognized association between stroke and AD (Kalaria, 2016; Goulay et al., 2020), researchers have turned to FDA approved therapeutics originally developed for AD, such as memantine (an N-methyl-D-aspartate, NMDA, receptor modulator), to target mechanisms beyond the acute stroke setting (Wang et al., 2017). Acetylcholinesterase inhibitors for AD have also been tested in post-stroke dementia patients (Ihara and Kalaria, 2014). Although these neurotransmitter-based approaches are important, they are unlikely to delay the onset or slow

neuronal degeneration, as they alleviate disease symptoms, but do not halt or reverse underlying degeneration, and are limited by side effects.

Therefore, in this study, we asked whether LM11A-31, a small molecule modulator of p75<sup>NTR</sup> signaling, could be used as a treatment for inhibiting neuronal degeneration and thereby preserving neuronal health and function after stroke. Our rationale was that decreases in the ratio of neurotrophic versus neurodegenerative signaling play a critical role in other neurodegenerative diseases, such as AD, and studies using mouse models of AD have found therapeutic benefits from treatments targeting p75<sup>NTR</sup> (Yang et al., 2008; Nguyen et al., 2014). LM11A-31 and its modulation of p75<sup>NTR</sup> signaling targets ubiquitous pathways and molecules shared among stroke and AD; for example, it can inhibit degenerative signaling via the tau kinases GSK3 $\beta$ , calpain, cdk5, c-jun, and p38, and promote survival signaling via AKT and CREB.

Furthermore, there is evidence that pharmacological modulation of Trk, p75<sup>NTR</sup>, and NGF may prevent memory impairment in a rat model of global ischemia (Choucry et al., 2019), and that neurotrophins, such as BDNF may have therapeutic potential in protection against neurodegeneration and recovery from stroke and traumatic brain injury (Houlton et al., 2019). Following stroke, the expression of both pro-apoptotic and anti-apoptotic signaling molecules and transcription factors that are modulated by LM11A-31 are also upregulated in the ischemic penumbra (Yang et al., 2008; Nguyen et al., 2014; Simmons et al., 2016; Yang et al., 2020a) and (Uzdensky, 2019).

In the first phase of our study, we found that aged C57BL/6 male mice exhibit changes in brain metabolism following stroke that were attenuated after 2 weeks of oral administration of LM11A-31. To ensure we were evaluating the impact of LM11A-31 on stroke recovery rather than on



infarct size, treatment was delayed until 1 week after stroke. One of the most striking changes was in the levels of several neurotransmitters. Stroke induced significant decreases in levels of the neurotransmitter's glutamate, serotonin, and acetylcholine, and a trend towards a reduction in dopamine. These decreases were not seen in LM11A-31-treated stroked mice, which had significantly higher levels of these neurotransmitters than stroked mice treated with vehicle alone.

Glutamate is the most abundant neurotransmitter in the nervous system and is involved in every major excitatory function in the vertebrate brain; glutamatergic synapses comprise >90% of the synaptic connections in the human brain. Because of its critical role in synaptic plasticity, glutamate plays a key role in cognitive function, including learning and memory (Groc and Choquet, 2020). Likewise, serotonin's biological function is pleiotropic, as it modulates mood, cognition, reward, and learning and memory (Bacque-Cazenave et al., 2020). Acetylcholine is equally important, playing a role in attention, motivation, arousal, and memory (Sofuoglu and Mooney, 2009). The stroke induced reduction in levels of these essential neurotransmitters may impede proper signaling and thereby affect cognition, well-being, motor function, and psychological health. The preservation of the levels of these neurotransmitters in response to LM11A-31 treatment suggests a broad improvement in neuronal health and function after stroke.

In further support of this improvement, treatment with LM11A-31 for 12 weeks, with administration again delayed until 1 week after stroke, resulted in the preservation of brain volume and prevented loss of NeuN immunoreactivity. Atrophy of the brain likely results from progressive degeneration of neurons, and the loss of these neurons likely impedes recovery and contributes to the manifestation of dementia after stroke in some patients.

LM11A-31 may preserve and optimize the function of some neurons better than others, as suggested by our finding that LM11A-31 reduced ChAT+ cholinergic loss but not TH+ loss

following stroke. This differential preservation may be explained by varying densities of p75<sup>NTR</sup> within the cell membranes of different neuronal subtypes; cholinergic neurons are rich in p75<sup>NTR</sup> and thus may bind more LM11A-31. Attesting to the protective effect of LM11A-31 on cholinergic neurons, other studies have found that treatment with LM11A-31 attenuates cholinergic degeneration in AD mouse models (Knowles et al., 2013; Nguyen et al., 2014; Simmons et al., 2014), and more recently that it suppresses age related basal forebrain cholinergic neuronal degeneration (Xie et al., 2019).

Importantly, in conjunction with its effect on neuropathology following stroke, LM11A-31 also significantly attenuated impairments in motor function on the ladder rung test; significantly improved overall well-being, as assessed by the nest construction test; and significantly lessened stroke-induced impulsive behavior in the open field test. Therefore, our data show that the administration of a p75<sup>NTR</sup> ligand increases neurotransmitter levels, reduces chronic stroke neuropathology, and improves recovery after stroke.

With regard to the mechanisms by which LM11A-31 improved stroke outcome, although LM11A-31 did not affect inflammation in the infarct, it did attenuate deficits in redox homeostasis following stroke by increasing the pool of reduced glutathione available to combat oxidative stress. Furthermore, treatment with LM11A-31 resulted in higher levels of acetyl CoA following stroke, suggesting LM11A-31 mitigated a stroke-induced reduction in glycolysis. Although our data do not reveal the mechanism by which acetyl CoA levels were increased by LM11A-31 treatment, an increase in several key metabolites in the glycogenesis pathway suggest that it may be via glycogenolysis. However, further investigation into chronic changes in energy metabolism after stroke and how LM11A-31 treatment affects these changes is required.

We also determined that LM11A-31 treatment attenuated the accumulation of hyperphosphorylated tau in degenerating thalamic white matter tracts of aged mice following stroke. This finding is consistent with the demonstrated ability of LM11A-31 to inhibit the tau kinases glycogen synthase kinase 3 beta (GSK3 $\beta$ ), calpain, cyclin dependent kinase 5 (cdk5), c-jun, and mitogen-activated protein kinase p38 (Yang et al., 2008; Nguyen et al., 2014; Yang et al., 2020b). Moreover, there is evidence for microglial activation in the proximity of tau deposits, and for an interplay between tau pathology and inflammatory cascades (Perea et al., 2020). Previous studies have found that LM11A-31 can attenuate increased microglial activation in APP mutant (hAPP-SL) mice with A $\beta$  and tau deposition (Nguyen et al., 2014). In line with this evidence, we observed that LM11A-31 administration decreased microglial activation in the thalamic white matter tracts of aged mice following stroke.

In conclusion, the findings of this study support a promising role for p75<sup>NTR</sup> as an effective target in the treatment of stroke beyond the acute setting, for which our current treatment options are limited. Furthermore, because LM11A-31 has already reached Phase IIa of clinical testing as a therapy for AD, it could potentially more rapidly move to clinical trials for its efficacy at preserving neuronal health and function in patients suffering from stroke and from patients suffering from AD and stroke.

**Acknowledgements:** We are grateful to Metabolon for their help with design, data acquisition and data analysis of the metabolomic experiment.

**Authorship contributions:**

Participated in research design: TVN, FML, KPD

Conducted experiments: TVN, RHC, KEC, FGG, JCZ, MATG, DB, HWM, SG

Contributed new reagents or tools: TY, FML

Performed data analysis: TVN, RHC, KEC, HWM, KPD

Contributed to the writing of the manuscript: TVN, RGS, FML, KPD

**Financial interest:**

Dr. Longo is listed as an inventor on patents relating to LM11A-31. Dr. Longo is also a principal of, and has financial interest in Pharmatrophix, a company focused on the development of small molecule ligands for neurotrophin receptors that has licensed several of these patents.

**Footnotes:**

This work was supported by the National Institutes of Health National Institute of Neurological Disorders and Stroke [Grant R01NS096091], the National Institute on Aging [Grants R01AG063808 and R21AG062781], the United States Department of Veterans Affairs [Grant I01RX003224], the Jean Perkins Foundation and by the Leducq Foundation [Grant Stroke-IMPACT: Stroke – immune mediated pathways and cognitive trajectory].

## FIGURES AND TABLE

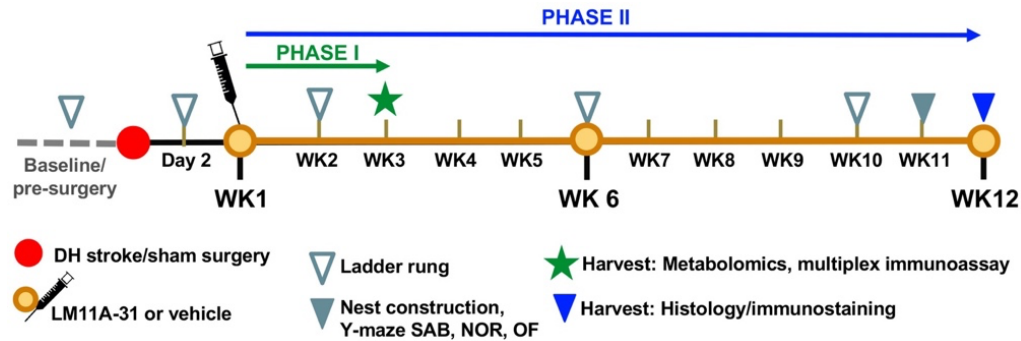

**Figure 1. Study design for oral administration of 50 mg/kg LM11A-31 to aged mice as a treatment for stroke.** For Phase I, mice were administered LM11A-31 or vehicle once time per day for a total of 2 weeks, beginning 1 week following stroke or sham surgery. At 3 weeks following surgery the infarct from each mouse was harvested for multiplex immunoassay. The remainder of each ipsilateral hemisphere was harvested for metabolomics. For Phase II, mice were administered LM11A-31 or vehicle 5 days per week for a total of 12 weeks, beginning 1 week following stroke or sham surgery. At 13 weeks following surgery, brains were harvested for histology and immunostaining. In Phase II, mice also underwent behavioral testing at the indicated timepoints.

| <b>Statistical comparisons</b>          |                                       |                                                 |                                          |                                            |
|-----------------------------------------|---------------------------------------|-------------------------------------------------|------------------------------------------|--------------------------------------------|
| <b>Group compared by ANOVA</b>          | <b><u>stroke veh</u><br/>sham veh</b> | <b><u>stroke LM11A-31</u><br/>sham LM11A-31</b> | <b><u>sham LM11A-31</u><br/>sham veh</b> | <b><u>stroke LM11A-31</u><br/>sham veh</b> |
| <b>Total biochemicals<br/>p&lt;0.05</b> | <b>169</b>                            | <b>135</b>                                      | <b>38</b>                                | <b>159</b>                                 |
| <b>Biochemicals<br/>(↑↓)</b>            | <b>128   41</b>                       | <b>107   28</b>                                 | <b>23   15</b>                           | <b>87   72</b>                             |

**Table 1. Total numbers of biochemicals that significantly differed (p≤0.05) between the listed experimental groups after global metabolic profiling from a total of 645 biochemicals analyzed.**

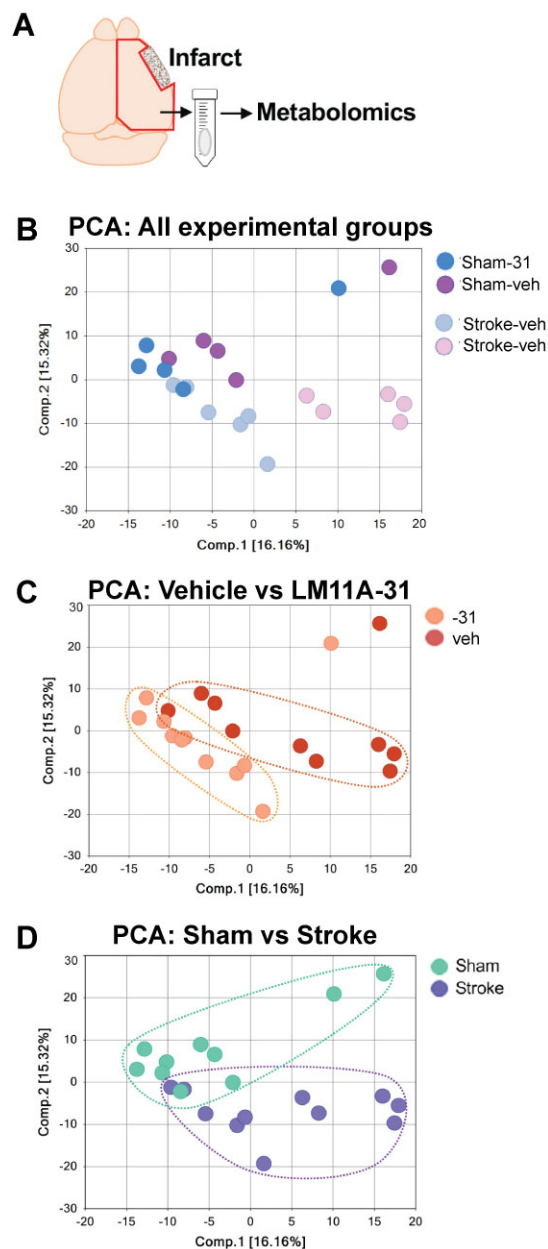

**Figure 2. Principal component analysis (PCA) to allow for visual assessment of the clustering of each sample within each group. (A) Area dissected for global metabolic profiling. (B) PCA analysis with all four groups represented. (C) PCA reveals separation between vehicle and LM11A-31 treated mice along component 1 demonstrating a strong drug treatment effect. (D) PCA reveals separation between mice that were subjected to sham and stroke surgery along component 2, demonstrating a strong disease effect.**



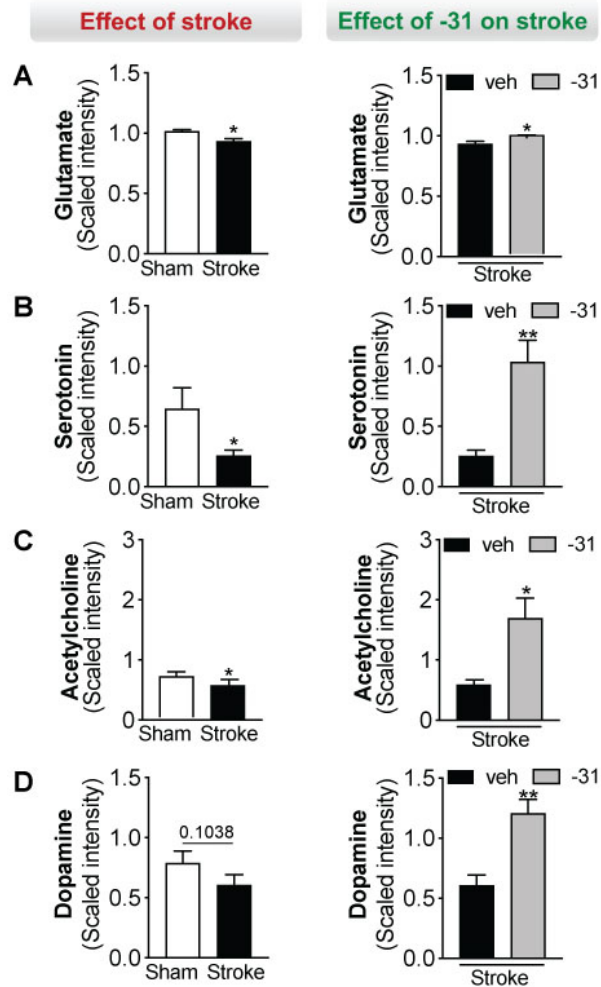

**Figure 3. LM11A-31 attenuated stroke induced reductions in glutamate, serotonin, and acetylcholine, and increased levels of dopamine.** Three weeks following stroke, the levels of **(A)** glutamate, **(B)** serotonin, and **(C)** acetylcholine were significantly reduced in the ipsilateral hemisphere compared to sham operated mice (*left graphs*). These reductions were attenuated following 2 weeks of LM11A-31 (-31) compared to vehicle (veh) treatment (*right graphs*). **(D)** Dopamine was not significantly reduced following stroke (*left graph*); however, it was significantly increased by 2 weeks of LM11A-31 compared to vehicle treatment (*right graph*). Data represent mean  $\pm$  SEM. \* $p < 0.05$  and \*\* $p < 0.01$ .

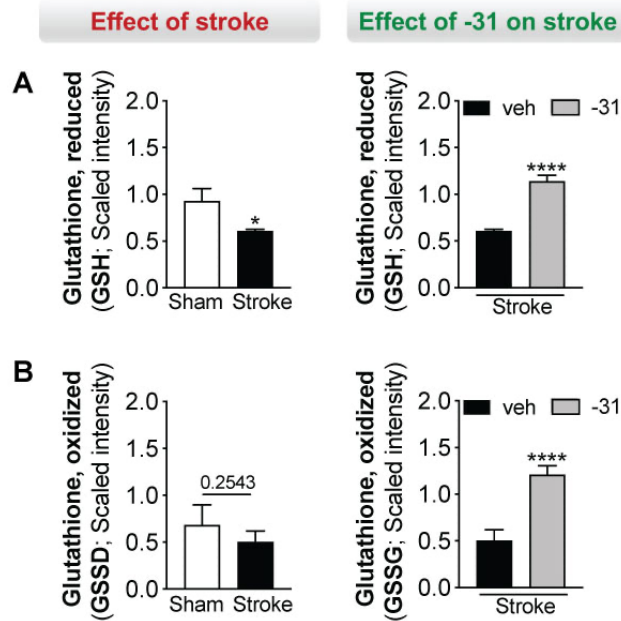

**Figure 4. LM11A-31 altered redox homeostasis after stroke.** (A) Compared to sham operated mice, stroked mice had a significantly lower level of reduced glutathione (GSH) in the hemisphere ipsilateral to the infarct. Stroked mice treated with LM11A-31 (-31) for 2 weeks had a significantly higher level of GSH than stroked mice treated with vehicle (veh) alone, suggesting a prevention or reversal of the stroke induced decrease in GSH. (B) Levels of oxidized glutathione (GSSG) were also increased in LM11A-31-treated mice compared to vehicle (veh) treated mice. The increase in GSSG suggests there is a larger pool of GSH available to mitigate oxidative stress caused by the chronic sequelae of stroke. Data represent mean  $\pm$  SEM. \* $p < 0.05$ , and \*\*\*\*  $p < 0.0001$ .

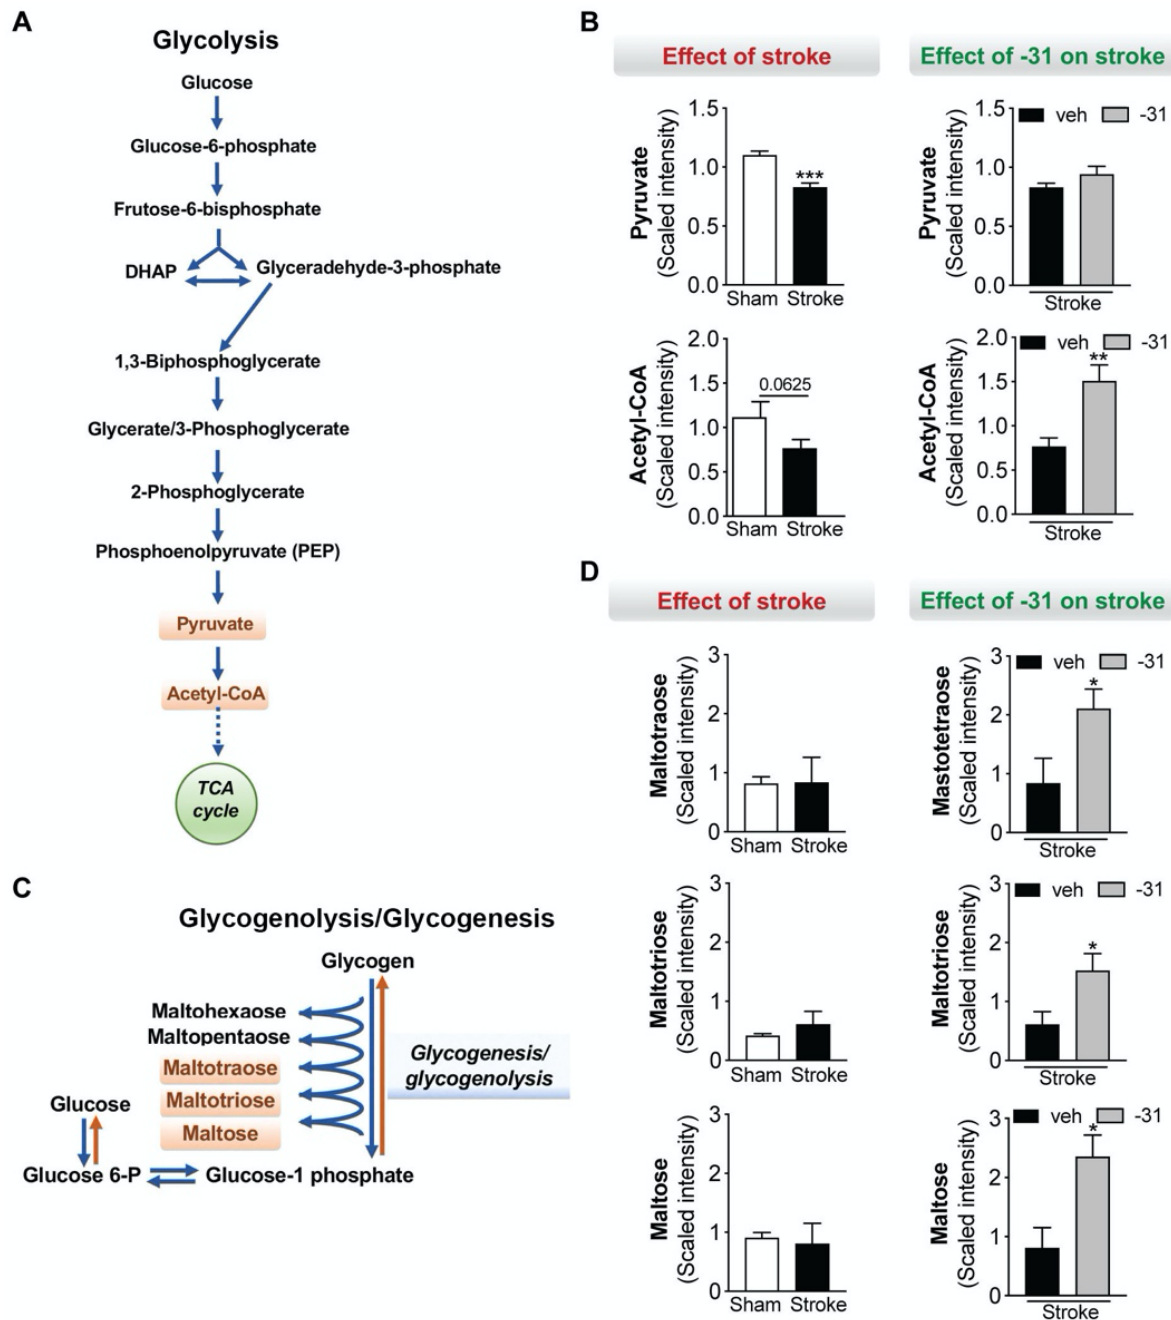

**Figure 5. LM11A-31 altered glucose metabolism after stroke.** (A) The glucose metabolism pathway or glycolysis. (B) Compared to sham operated mice, stroked mice had significantly lower levels of pyruvate in their brains, and showed a trend towards lower levels of acetyl-CoA ( $p=0.0625$ ). Although 2 weeks of LM11A-31 (-31) treatment did not significantly increase pyruvate levels compared to vehicle (veh) treatment, it did significantly increase levels of acetyl-CoA

compared to vehicle (veh) treatment. **(C)** Glycogenolysis/Glycogenesis. **(D)** Although not altered by stroke, maltotetraose (*top graphs*), maltotriose (*middle graphs*), and maltose (*bottom graphs*) were all increased following LM11A-31 treatment. This suggests that an increase in glycogenolysis may be the mechanism by which LM11A-31 increased acetyl-CoA after stroke. Data represent mean  $\pm$  SEM. \* $p < 0.05$ , \*\* $p < 0.01$ , and \*\*\* $p < 0.001$ .

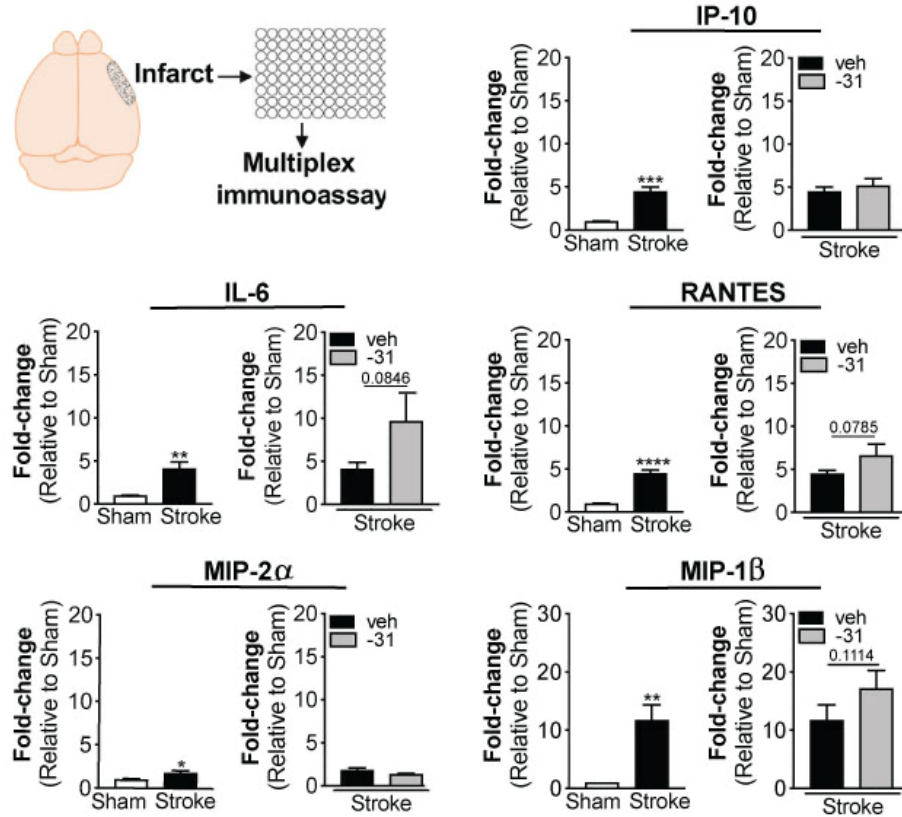

**Figure 6. LM11A-31 did not alter cytokine levels in the infarct. (A)** Out of 25 cytokines measured by multiplex immunoassay, only MIP-1 $\beta$ , IL-6, IP-10, MIP-2A and RANTES were significantly increased in the infarct at 3 weeks following stroke compared to sham surgery. Treatment with LM11A-31 for two weeks, beginning one week after stroke did not significantly alter the levels of these cytokines. Data represent mean  $\pm$  SEM. \* $p < 0.05$ , \*\* $p < 0.01$ , \*\*\* $p < 0.001$ , and \*\*\*\* $p < 0.0001$ .

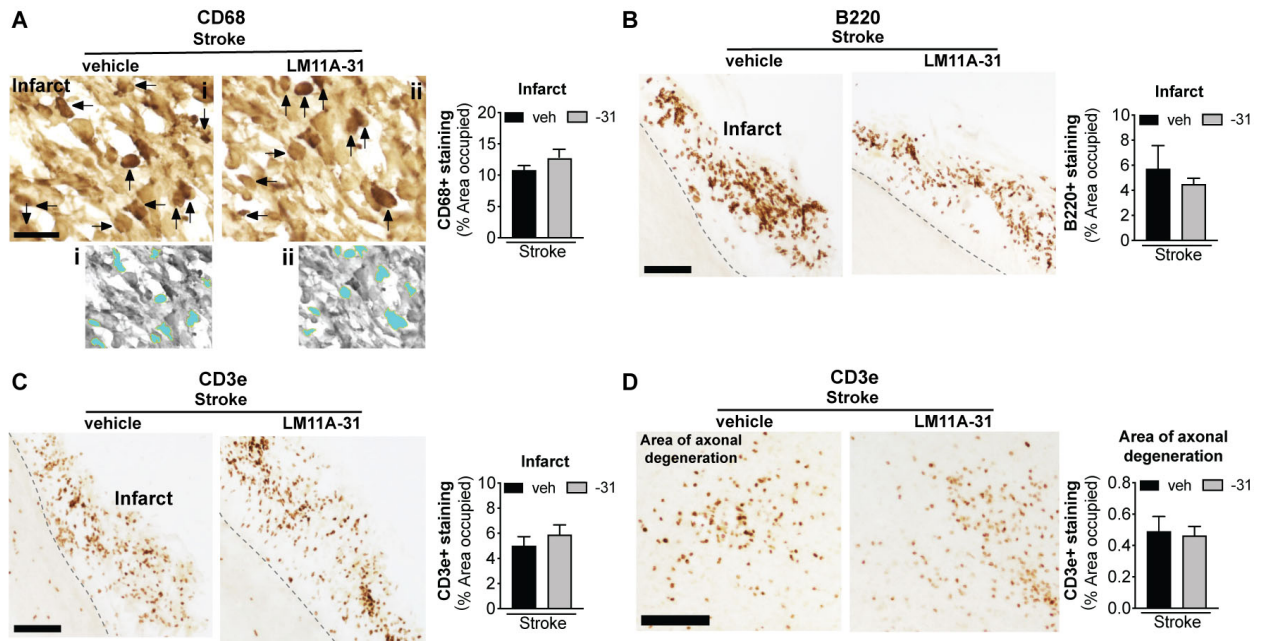

**Figure 7. LM11A-31 did not alter immune cell infiltration in the infarct or T cell infiltration in the area of axonal degeneration.** (A) Representative images and quantification of CD68 immunolabeled microglia and macrophages in the infarcts of mice given vehicle (veh) or LM11A-31 (-31) for 12 weeks, starting 1-week post-stroke. Panels (i) and (ii) show the method of thresholding used to measure the % area covered by cellular CD68+ immunostaining. Stroked mice given vehicle and stroked mice given LM11A-31 displayed similar CD68+ immunoreactivity; quantification revealed no significant differences between these treatment groups. (B) B220+ immunolabeled B cells and (C) CD3e+ immunolabeled T cells in the infarcts of mice given vehicle (veh) or LM11A-31 (-31) for 12 weeks, starting 1-week post-stroke. Stroked mice given vehicle and stroked mice given LM11A-31 also displayed similar B220+, and CD3e+ immunoreactivity; quantification revealed no significant differences between mice treated with either agent. (D) Representative images of CD3e+ immunolabeled T cells in white matter tracts projecting from the infarct area. There was no difference in CD3e+ immunoreactivity in stroked mice given vehicle or LM11A-31 in this area of axonal degeneration. Scale bars, 125  $\mu$ m. Data represent mean  $\pm$  SEM.

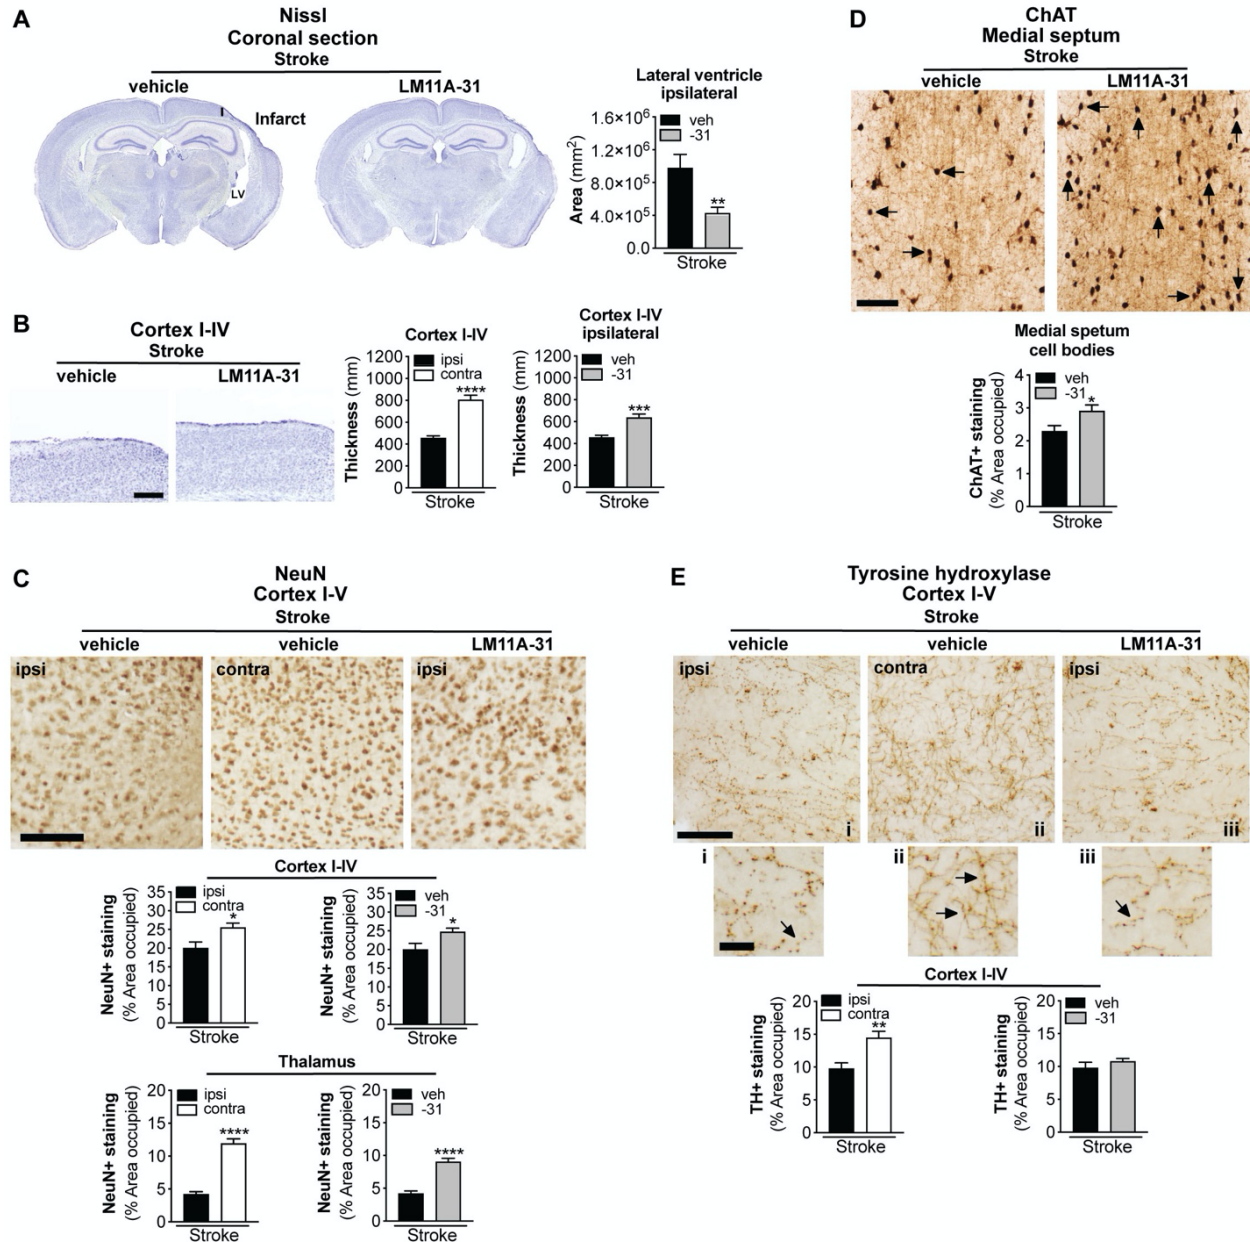

**Figure 8. LM11A-31 reduces brain atrophy and preserves NeuN and ChAT immunoreactivity following stroke.** (A) Representative 4× images of Nissl-stained whole brain sections from mice given vehicle (veh) or LM11A-31 (-31) for 12 weeks, starting 1-week post-stroke (*left images*). Quantification of the lateral ventricle in the ipsilateral (ipsi) hemisphere revealed significant ventricle enlargement in stroked mice, which LM11A-31 significantly reduced (*right graph*). (B) Representative 4× images of cortical layers VI-I of the primary somatosensory

cortex ipsilateral to the infarct (*left images*). Quantification of cortical thickness in the ipsilateral compared to contralateral (contra) hemisphere revealed significant tissue thinness in stroked mice. Stroked mice treated with LM11A-31 showed significantly thicker tissue in this area than stroked mice treated with vehicle alone (*right graph*). **(C)** Representative 10× images of neuronal nuclei (NeuN) labeled in the ipsilateral primary somatosensory cortex (*top images*). Scale bar, 125 μm. Quantification revealed a significant reduction of NeuN+ staining in stroked mice, which was mitigated by LM11A-31 treatment (*middle and bottom graphs*). **(D)** Representative 10× images of choline acetyltransferase (ChAT)+ somas and neurites, and innervating projection fibers in the medial septum (*left images*). Many neurites (arrows) in the vehicle-treated stroked mice displayed qualitative degenerative changes, including decreased length, which was not as evident in mice treated with LM11A-31. Scale bar, 125 μm. Quantification of cholinergic neurons, neurites, and fiber projections revealed a significant reduction of ChAT+ staining in stroked mice, which LM11A-31 also mitigated (*right graph*). **(E)** Representative 10× images of tyrosine hydroxylase (TH)+ projection fibers in the primary somatosensory cortex (*top images and inserts*). Compared to sham operated mice, stroked mice displayed less abundant and more broken or disconnected fibers, which LM11A-31 treatment did not affect. Scale bar, 125 μm (40 μm for inserts). TH+ fiber quantification revealed significantly less TH+ immunostaining in stroked mice compared to sham operated mice, which was not altered by LM11A-31 treatment (*bottom graphs*). Data represent mean ± SEM. \*p<0.05, \*\*p<0.01, \*\*\*p<0.001, and \*\*\*\*p<0.0001.



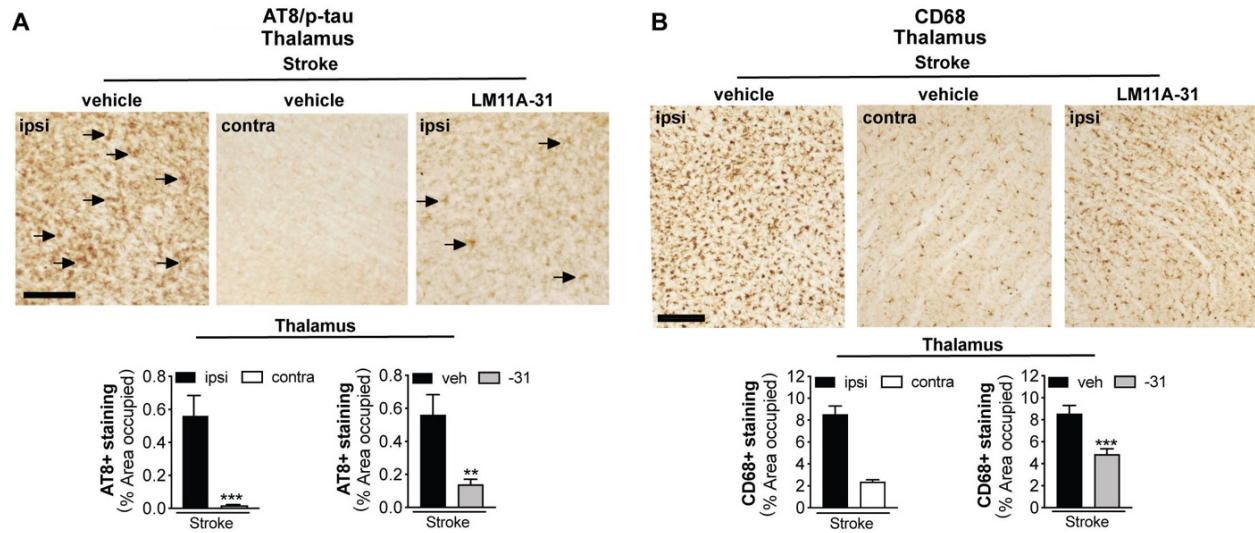

**Figure 9. LM11A-31 reduces tau pathology and microglial activation in white matter tracts of the thalamus after stroke.** (A) Representative images of p-tau labelling using anti-tau (AT8) in the thalamus (white matter tracts) of stroked mice treated with vehicle and LM11A-31 (*top images*). Scale bar, 125  $\mu$ m. Quantification revealed significantly more deposits of p-tau in stroked mice treated with vehicle compared to those treated with LM11A-31 (*bottom graph*). (B) Representative 10 $\times$  images of CD68 labeled microglia and macrophage in the thalamus (white matter tracts) in stroked mice treated with vehicle or LM11A-31 (*top images*). Scale bar, 125  $\mu$ m. Quantification of CD68 immunoreactivity revealed significantly less staining in vehicle treated stroked mice compared to LM11A-31 treated stroked mice (*bottom graphs*). Data represent mean  $\pm$  SEM. \*\* $p < 0.01$ , and \*\*\* $p < 0.001$ .

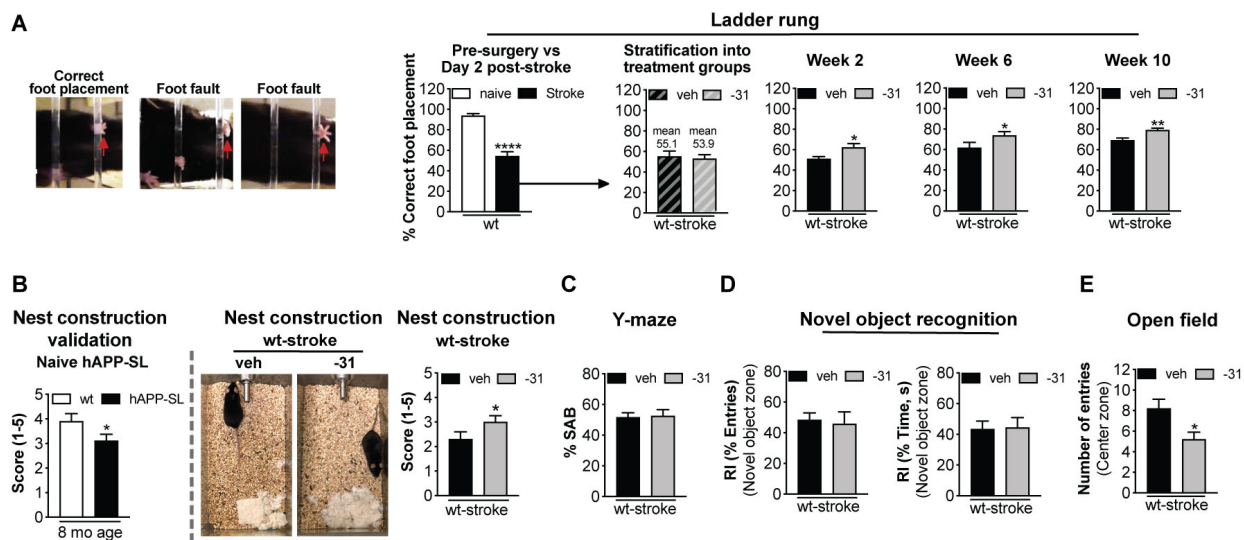

**Figure 10. LM11A-31 ameliorates stroke induced impairment of motor function, decline in overall well-being, and anxiety like behavior in aged mice. (A)** Motor ability on the ladder rung test (*left images show examples of correct foot placement and foot faults*) was assessed at 1 week pre-surgery (*left → first graph*), and at 2 days (*first graph*), 2 weeks (*third graph*), 6 weeks (*fourth graph*), and 10 weeks (*fifth graph*) post-surgery. On Day 2, there was a motor deficit in stroked versus sham operated mice. Ladder rung test scores at 2 days post-surgery were used to stratify the stroked mice into treatment groups (*second graph*). Compared to vehicle treated mice, stroked mice given LM11A-31 displayed a significant improvement of motor function. **(B)** Mouse well-being was assessed with the nest construction test. The test was first validated using 8-month-old APP mutant mice (hAPP-SL), which displayed significant impairment in nest construction compared to their age-matched littermates (*left graph*). Among stroked mice, LM11A-31 treated mice displayed significantly better nest building ability than mice given vehicle (*middle image and left graph*). **(C)** In stroked mice, LM11A-31 treatment resulted in no significant differences in spatial working memory on the Y-maze. **(D)** LM11A-31 treatment in stroked mice also resulted in no significant differences in object recognition deficits, as assessed by the number of entries into the novel object zone (*left graph*) and the time spent in the novel object zone (*right graph*). **(E)** As assessed through an open field test, impulsive like behavior was significantly lower

in LM11A-31 treated stroked mice than in vehicle treated stroked mice. Data represent mean  $\pm$  SEM. \* $p < 0.05$ , \*\* $p < 0.01$ , \*\*\*\* $p < 0.0001$ .

## REFERENCES

- Bacque-Cazenave J, Bharatiya R, Barriere G, Delbecque JP, Bouguiyoud N, Di Giovanni G, Cattaert D and De Deurwaerdere P (2020) Serotonin in Animal Cognition and Behavior. *Int J Mol Sci* **21**.
- Becker K, Cana A, Baumgartner W and Spitzbarth I (2018) p75 Neurotrophin Receptor: A Double-Edged Sword in Pathology and Regeneration of the Central Nervous System. *Vet Pathol* **55**:786-801.
- Choi WT, Tosun M, Jeong HH, Karakas C, Semerci F, Liu Z and Maletic-Savatic M (2018) Metabolomics of mammalian brain reveals regional differences. *BMC Syst Biol* **12**:127.
- Choucry AM, Al-Shorbagy MY, Attia AS and El-Abhar HS (2019) Pharmacological Manipulation of Trk, p75NTR, and NGF Balance Restores Memory Deficit in Global Ischemia/Reperfusion Model in Rats. *J Mol Neurosci* **68**:78-90.
- Chung AG, Frye JB, Zbesko JC, Constantopoulos E, Hayes M, Figueroa AG, Becktel DA, Antony Day W, Konhilas JP, McKay BS, Nguyen TV and Doyle KP (2018) Liquefaction of the Brain following Stroke Shares a Similar Molecular and Morphological Profile with Atherosclerosis and Mediates Secondary Neurodegeneration in an Osteopontin-Dependent Mechanism. *eNeuro* **5**.
- Deacon RM (2006) Assessing nest building in mice. *Nat Protoc* **1**:1117-1119.
- Doyle KP, Fathali N, Siddiqui MR and Buckwalter MS (2012) Distal hypoxic stroke: a new mouse model of stroke with high throughput, low variability and a quantifiable functional deficit. *J Neurosci Methods* **207**:31-40.
- Doyle KP, Quach LN, Sole M, Axtell RC, Nguyen TV, Soler-Llavina GJ, Jurado S, Han J, Steinman L, Longo FM, Schneider JA, Malenka RC and Buckwalter MS (2015) B-lymphocyte-mediated delayed cognitive impairment following stroke. *J Neurosci* **35**:2133-2145.

- Faizi M, Bader PL, Saw N, Nguyen TV, Beraki S, Wyss-Coray T, Longo FM and Shamloo M (2012) Thy1-hAPP(Lond/Swe+) mouse model of Alzheimer's disease displays broad behavioral deficits in sensorimotor, cognitive and social function. *Brain Behav* **2**:142-154.
- Fogle JE, Hudson L, Thomson A, Sherman B, Gruen M, Lacelles BD, Colby BM, Clary G, Longo F and Meeker RB (2021) Improved neurocognitive performance in FIV infected cats following treatment with the p75 neurotrophin receptor ligand LM11A-31. *J Neurovirol*.
- Franklin KBJ and Paxinos G (2008) The mouse brain in stereotaxic coordinates. *Elsevier Science Amsterdam*.
- Goulay R, Mena Romo L, Hol EM and Dijkhuizen RM (2020) From Stroke to Dementia: a Comprehensive Review Exposing Tight Interactions Between Stroke and Amyloid-beta Formation. *Transl Stroke Res* **11**:601-614.
- Groc L and Choquet D (2020) Linking glutamate receptor movements and synapse function. *Science* **368**.
- Grudzien A, Shaw P, Weintraub S, Bigio E, Mash DC and Mesulam MM (2007) Locus coeruleus neurofibrillary degeneration in aging, mild cognitive impairment and early Alzheimer's disease. *Neurobiol Aging* **28**:327-335.
- Houlton J, Abumaria N, Hinkley SFR and Clarkson AN (2019) Therapeutic Potential of Neurotrophins for Repair After Brain Injury: A Helping Hand From Biomaterials. *Front Neurosci* **13**:790.
- Ihara M and Kalara RN (2014) Understanding and preventing the development of post-stroke dementia. *Expert Rev Neurother* **14**:1067-1077.
- Iversen LL, Rossor MN, Reynolds GP, Hills R, Roth M, Mountjoy CQ, Foote SL, Morrison JH and Bloom FE (1983) Loss of pigmented dopamine-beta-hydroxylase positive cells from locus coeruleus in senile dementia of Alzheimer's type. *Neurosci Lett* **39**:95-100.
- James ML, Belichenko NP, Shuhendler AJ, Hoehne A, Andrews LE, Condon C, Nguyen TV, Reiser V, Jones P, Trigg W, Rao J, Gambhir SS and Longo FM (2017) [(18)F]GE-180 PET

- Detects Reduced Microglia Activation After LM11A-31 Therapy in a Mouse Model of Alzheimer's Disease. *Theranostics* **7**:1422-1436.
- Jeganathan S, Hascher A, Chinnathambi S, Biernat J, Mandelkow EM and Mandelkow E (2008) Proline-directed pseudo-phosphorylation at AT8 and PHF1 epitopes induces a compaction of the paperclip folding of Tau and generates a pathological (MC-1) conformation. *J Biol Chem* **283**:32066-32076.
- Jirkof P (2014) Burrowing and nest building behavior as indicators of well-being in mice. *J Neurosci Methods* **234**:139-146.
- Kalaria RN (2016) Neuropathological diagnosis of vascular cognitive impairment and vascular dementia with implications for Alzheimer's disease. *Acta Neuropathol* **131**:659-685.
- Knowles JK, Rajadas J, Nguyen TV, Yang T, LeMieux MC, Vander Griend L, Ishikawa C, Massa SM, Wyss-Coray T and Longo FM (2009) The p75 neurotrophin receptor promotes amyloid-beta(1-42)-induced neuritic dystrophy in vitro and in vivo. *J Neurosci* **29**:10627-10637.
- Knowles JK, Simmons DA, Nguyen TV, Vander Griend L, Xie Y, Zhang H, Yang T, Pollak J, Chang T, Arancio O, Buckwalter MS, Wyss-Coray T, Massa SM and Longo FM (2013) Small molecule p75NTR ligand prevents cognitive deficits and neurite degeneration in an Alzheimer's mouse model. *Neurobiol Aging* **34**:2052-2063.
- Longo FM and Massa SM (2008) Small molecule modulation of p75 neurotrophin receptor functions. *CNS Neurol Disord Drug Targets* **7**:63-70.
- Longo FM and Massa SM (2013) Small-molecule modulation of neurotrophin receptors: a strategy for the treatment of neurological disease. *Nat Rev Drug Discov* **12**:507-525.
- Mann DM (1988) The pathological association between Down syndrome and Alzheimer disease. *Mech Ageing Dev* **43**:99-136.

Massa SM, Xie Y, Yang T, Harrington AW, Kim ML, Yoon SO, Kraemer R, Moore LA, Hempstead BL and Longo FM (2006) Small, nonpeptide p75NTR ligands induce survival signaling and inhibit proNGF-induced death. *J Neurosci* **26**:5288-5300.

Meeker RB, Poulton W, Clary G, Schriver M and Longo FM (2016) Novel p75 neurotrophin receptor ligand stabilizes neuronal calcium, preserves mitochondrial movement and protects against HIV associated neuropathogenesis. *Exp Neurol* **275 Pt 1**:182-198.

Nguyen TV, Frye JB, Zbesko JC, Stepanovic K, Hayes M, Urzua A, Serrano G, Beach TG and Doyle KP (2016) Multiplex immunoassay characterization and species comparison of inflammation in acute and non-acute ischemic infarcts in human and mouse brain tissue. *Acta Neuropathol Commun* **4**:100.

Nguyen TV, Hayes M, Zbesko JC, Frye JB, Congrove NR, Belichenko NP, McKay BS, Longo FM and Doyle KP (2018) Alzheimer's associated amyloid and tau deposition co-localizes with a homeostatic myelin repair pathway in two mouse models of post-stroke mixed dementia. *Acta Neuropathol Commun* **6**:100.

Nguyen TV, Shen L, Vander Griend L, Quach LN, Belichenko NP, Saw N, Yang T, Shamloo M, Wyss-Coray T, Massa SM and Longo FM (2014) Small molecule p75NTR ligands reduce pathological phosphorylation and misfolding of tau, inflammatory changes, cholinergic degeneration, and cognitive deficits in AbetaPP(L/S) transgenic mice. *J Alzheimers Dis* **42**:459-483.

Perea JR, Bolos M and Avila J (2020) Microglia in Alzheimer's Disease in the Context of Tau Pathology. *Biomolecules* **10**.

Rha DW, Kang SW, Park YG, Cho SR, Lee WT, Lee JE, Nam CM, Han KH and Park ES (2011) Effects of constraint-induced movement therapy on neurogenesis and functional recovery after early hypoxic-ischemic injury in mice. *Dev Med Child Neurol* **53**:327-333.

- Ribbenstedt A, Ziarrusta H and Benskin JP (2018) Development, characterization and comparisons of targeted and non-targeted metabolomics methods. *PLoS One* **13**:e0207082.
- Rockenstein E, Mallory M, Mante M, Sisk A and Masliah E (2001) Early formation of mature amyloid-beta protein deposits in a mutant APP transgenic model depends on levels of Abeta(1-42). *J Neurosci Res* **66**:573-582.
- Seshadri S, Beiser A, Kelly-Hayes M, Kase CS, Au R, Kannel WB and Wolf PA (2006) The lifetime risk of stroke: estimates from the Framingham Study. *Stroke* **37**:345-350.
- Shi J, Longo FM and Massa SM (2013) A small molecule p75(NTR) ligand protects neurogenesis after traumatic brain injury. *Stem Cells* **31**:2561-2574.
- Simmons DA, Belichenko NP, Ford EC, Semaan S, Monbureau M, Aiyaswamy S, Holman CM, Condon C, Shamloo M, Massa SM and Longo FM (2016) A small molecule p75(NTR) ligand normalizes signalling and reduces Huntington's disease phenotypes in R6/2 and BACHD mice. *Hum Mol Genet* **25**:4920-4938.
- Simmons DA, Belichenko NP, Yang T, Condon C, Monbureau M, Shamloo M, Jing D, Massa SM and Longo FM (2013) A small molecule TrkB ligand reduces motor impairment and neuropathology in R6/2 and BACHD mouse models of Huntington's disease. *J Neurosci* **33**:18712-18727.
- Simmons DA, Knowles JK, Belichenko NP, Banerjee G, Finkle C, Massa SM and Longo FM (2014) A small molecule p75NTR ligand, LM11A-31, reverses cholinergic neurite dystrophy in Alzheimer's disease mouse models with mid- to late-stage disease progression. *PLoS One* **9**:e102136.
- Simmons DA, Mills BD, Butler Iii RR, Kuan J, McHugh TLM, Akers C, Zhou J, Syriani W, Grouban M, Zeineh M and Longo FM (2021) Neuroimaging, Urinary, and Plasma Biomarkers of Treatment Response in Huntington's Disease: Preclinical Evidence with the p75(NTR) Ligand LM11A-31. *Neurotherapeutics*.



- Sofuoglu M and Mooney M (2009) Cholinergic functioning in stimulant addiction: implications for medications development. *CNS Drugs* **23**:939-952.
- Tep C, Lim TH, Ko PO, Getahun S, Ryu JC, Goettl VM, Massa SM, Basso M, Longo FM and Yoon SO (2013) Oral administration of a small molecule targeted to block proNGF binding to p75 promotes myelin sparing and functional recovery after spinal cord injury. *J Neurosci* **33**:397-410.
- Uzdensky AB (2019) Apoptosis regulation in the penumbra after ischemic stroke: expression of pro- and antiapoptotic proteins. *Apoptosis* **24**:687-702.
- Wang YC, Sanchez-Mendoza EH, Doepfner TR and Hermann DM (2017) Post-acute delivery of memantine promotes post-ischemic neurological recovery, peri-infarct tissue remodeling, and contralesional brain plasticity. *J Cereb Blood Flow Metab* **37**:980-993.
- Xie Y, Meeker RB, Massa SM and Longo FM (2019) Modulation of the p75 neurotrophin receptor suppresses age-related basal forebrain cholinergic neuron degeneration. *Sci Rep* **9**:5273.
- Xie Y, Seawell J, Boesch E, Allen L, Suchy A, Longo FM and Meeker RB (2021) Small molecule modulation of the p75 neurotrophin receptor suppresses age- and genotype-associated neurodegeneration in HIV gp120 transgenic mice. *Exp Neurol* **335**:113489.
- Yang T, Knowles JK, Lu Q, Zhang H, Arancio O, Moore LA, Chang T, Wang Q, Andreasson K, Rajadas J, Fuller GG, Xie Y, Massa SM and Longo FM (2008) Small molecule, non-peptide p75 ligands inhibit Abeta-induced neurodegeneration and synaptic impairment. *PLoS One* **3**:e3604.
- Yang T, Liu H, Tran KC, Leng A, Massa SM and Longo FM (2020a) Small-molecule modulation of the p75 neurotrophin receptor inhibits a wide range of tau molecular pathologies and their sequelae in P301S tauopathy mice. *Acta Neuropathol Commun* **8**:156.
- Yang T, Tran KC, Zeng AY, Massa SM and Longo FM (2020b) Small molecule modulation of the p75 neurotrophin receptor inhibits multiple amyloid beta-induced tau pathologies. *Sci Rep* **10**:20322.

Zarow C, Lyness SA, Mortimer JA and Chui HC (2003) Neuronal loss is greater in the locus coeruleus than nucleus basalis and substantia nigra in Alzheimer and Parkinson diseases.

*Arch Neurol* **60**:337-341.

Zbesko JC, Nguyen TV, Yang T, Frye JB, Hussain O, Hayes M, Chung A, Day WA, Stepanovic K, Krumberger M, Mona J, Longo FM and Doyle KP (2018) Glial scars are permeable to the neurotoxic environment of chronic stroke infarcts. *Neurobiol Dis* **112**:63-78.

Zweig RM, Ross CA, Hedreen JC, Peyser C, Cardillo JE, Folstein SE and Price DL (1992) Locus coeruleus involvement in Huntington's disease. *Arch Neurol* **49**:152-156.
